# Supplementary material for: Ovarian cycling and reproductive state shape the vaginal microbiota in wild baboons
Source: PubMed Central journal article supplement (PMC5248513; doi:10.1186/s40168-017-0228-z), 2017-01-19
Supplement: 40168_2017_228_MOESM4_ESM.pdf [file 40168_2017_228_MOESM4_ESM.pdf]

# Ovarian cycling and reproductive state shape the vaginal microbiota in wild baboons

*E. A. Miller et al.*

This document contains R code for all statistical analyses conducted for the manuscript as well as the R code to generate all figures.

## Required data files:

All data files required to reproduce analyses will be made available on the Dryad Digital Respository (<http://datadryad.org/><http://datadryad.org/> (<http://datadryad.org/>)).

| File Name                        | Description                                                                                |
|----------------------------------|--------------------------------------------------------------------------------------------|
| <i>otu_table.txt</i>             | OTU table with taxonomic information in last column (not normalized for read count)        |
| <i>otu_table_all.txt</i>         | OTU table with <i>all</i> OTUs (even those in only one sample)                             |
| <i>rel_abundance_phylum.txt</i>  | phylum relative abundance by sample (created with Qiime script <i>summarize_taxa.py</i> )  |
| <i>rel_abundance_class.txt</i>   | class relative abundance by sample (created with Qiime script <i>summarize_taxa.py</i> )   |
| <i>rel_abundance_order.txt</i>   | order relative abundance by sample (created with Qiime script <i>summarize_taxa.py</i> )   |
| <i>rel_abundance_family.txt</i>  | family relative abundance by sample (created with Qiime script <i>summarize_taxa.py</i> )  |
| <i>rel_abundance_genus.txt</i>   | genus relative abundance by sample (created with Qiime script <i>summarize_taxa.py</i> )   |
| <i>rel_abundance_species.txt</i> | species relative abundance by sample (created with Qiime script <i>summarize_taxa.py</i> ) |
| <i>metadata.txt</i>              | Sample metadata (including alpha diversity metrics)                                        |
| <i>all_consort.txt</i>           | Consortship and group size data on all ABRP adult female between 2007 and 2010             |

| File Name                          | Description                                                                                                                   |
|------------------------------------|-------------------------------------------------------------------------------------------------------------------------------|
| <i>bray_curtis_matrix.txt</i>      | Bray-Curtis dissimilarity matrix                                                                                              |
| <i>weighted_unifrac_matrix.txt</i> | Weighted UniFrac distance matrix                                                                                              |
| <i>lefse_rep.txt</i>               | Results of reproductive states LEfSe analyses                                                                                 |
| <i>lefse_cycle.txt</i>             | Results of ovarian cycle phases LEfSe analyses                                                                                |
| <i>vaginal_ph.txt</i>              | Vaginal pH measurements from a separate set of 20 female baboons with corresponding reproductive state or ovarian cycle phase |
| <i>relatedness.txt</i>             | Relatedness matrix between baboons                                                                                            |
| <i>consort_history.txt</i>         | Consortship history for female by sample                                                                                      |

```

otu <- read.table("otu_table.txt", header=TRUE, row.names=1)
otu_all <- read.table("otu_table_all.txt", header=TRUE, row.names=1)
phylum <- read.table("rel_abundance_phylum.txt", header=TRUE, row.names=1)
class <- read.table("rel_abundance_class.txt", header=TRUE, row.names=1)
order <- read.table("rel_abundance_order.txt", header=TRUE, row.names=1)
family <- read.table("rel_abundance_family.txt", header=TRUE, row.names=1)
genus <- read.table("rel_abundance_genus.txt", header=TRUE, row.names=1)
species <- read.table("rel_abundance_species.txt", header=TRUE, row.names=1)
meta <- read.table("metadata.txt", header=TRUE, row.names=1, na.strings="NA")
all_consort <- read.table("all_consorts.txt", header=TRUE)
bray <- read.table("bray_curtis_matrix.txt", header=TRUE, row.names=1)
unifrac <- read.table("weighted_unifrac_matrix.txt", header=TRUE, row.names=1)
lefse_rep <- read.table("lefse_rep.txt", header=TRUE, row.names=1)
lefse_cycle <- read.table("lefse_cycle.txt", header=TRUE, row.names=1)
ph <- read.table("vaginal_ph.txt", header=TRUE)
relate <- as.matrix(read.table("relatedness.txt", header=TRUE, row.names=1))
history <- as.matrix(read.table("consort_history.txt", header=TRUE, row.names=1))
)

```

## Sequencing metrics:

```

read_count <- data.frame(read_count=(colSums(otu[1:52])))
# Total read count
sum(read_count$read_count)

```

```
## [1] 188665626
```

```

# Range read count per sample
range(read_count$read_count)

```

```
## [1] 1777373 7024839
```

```
# Mean read count per sample  
mean(read_count$read_count)
```

```
## [1] 3628185
```

```
# Add read count to metadata dataframe  
meta <- merge(meta, read_count, by="row.names")  
rownames(meta) <- meta[, 'Row.names']  
meta <- subset(meta, select=-c(Row.names))
```

```
# Good's Coverage Estimator  
#  $1 - (n / N)$ , where  $n$  is the number of OTUs in a single read and  $N$  is the total number of reads analyzed  
n <- colSums(otu[1:52] == 1)  
N <- colSums(otu[1:52])  
coverage <- data.frame(coverage=1-(n/N))  
# Add Good's Coverage Estimator to metadata dataframe  
meta <- merge(meta, coverage, by="row.names")  
rownames(meta) <- meta[, 'Row.names']  
meta <- subset(meta, select=-c(Row.names))  
meta$coverage
```

```
## [1] 0.9998651 0.9997914 0.9997550 0.9998283 0.9997871 0.9998451 0.9998425  
## [8] 0.9998377 0.9996994 0.9996186 0.9997203 0.9997668 0.9997645 0.9997434  
## [15] 0.9997197 0.9998093 0.9997875 0.9996394 0.9998208 0.9998171 0.9996327  
## [22] 0.9998421 0.9998164 0.9997938 0.9995696 0.9996584 0.9996595 0.9997580  
## [29] 0.9997624 0.9997552 0.9996736 0.9996857 0.9996358 0.9997834 0.9997213  
## [36] 0.9998960 0.9997389 0.9998260 0.9997192 0.9997722 0.9997255 0.9997753  
## [43] 0.9997025 0.9998384 0.9998030 0.9997568 0.9998379 0.9996313 0.9997512  
## [50] 0.9998059 0.9998378 0.9998069
```

## OTU table normalization:

To control for differences in sequencing depth between samples, we normalized OTU table read counts using cumulative-sum scaling implemented in the R package, `metagenomeSeq` (version 1.4.2).

- Note: Starting with version 1.7.10, `metagenomeSeq` updated the default quantile estimate (.5) for low estimates. For the version of `metagenomeSeq` used in this manuscript (1.4.2), the quantile estimate was 0.3144699.

```

library(metagenomeSeq) #version 1.4.2
obj <- newMRexperiment(as.matrix(otu[1:52]))
p <- cumNormStat(obj)
# Use p <- 0.3144699 if using metagenomeSeq version 1.7.10 or later.
obj_sf <- cumNorm(obj, p=p)
otu_norm <- MRcounts(obj_sf, norm=T)
# Add back in taxonomy
tax <- otu[, "taxonomy", drop=FALSE]
otu_norm_tax <- merge(otu_norm, tax, by="row.names")
rownames(otu_norm_tax) <- otu_norm_tax$Row.names
otu_norm_tax <- otu_norm_tax[,-1]

```

## RESULTS

### Taxonomic relative abundance

#### Calculate data for TABLE S2A:

```

# Calculate phylum prevalence and % relative abundance (mean, SD, minimum, and maximum)
phylum1 <- phylum
rownames(phylum1) <- gsub("k__|p__", "", rownames(phylum1))
rownames(phylum1) <- gsub(";", "|", rownames(phylum1))
rownames(phylum1) <- gsub("Other", "Unclassified", rownames(phylum1))
rownames(phylum1) <- gsub("Unassigned", "Unclassified", rownames(phylum1))
rownames(phylum1) <- gsub("Candidate_division_SR1", "Candidate division SR1", rownames(phylum1))
Table_S2A <- cbind(as.data.frame(rowSums(phylum1 != 0)),
                  round(as.data.frame(rowSums(phylum1 != 0))/ncol(phylum1)*100, 2),
                  format(as.data.frame(rowMeans(phylum1)*100), digits=3, scientific=TRUE),
                  format(as.data.frame(apply(phylum1, 1, sd, na.rm=TRUE)*100), digits=3, scientific=TRUE),
                  format(as.data.frame(apply(phylum1, 1, min, na.rm=TRUE)*100), digits=3, scientific=TRUE),
                  format(as.data.frame(apply(phylum1, 1, max, na.rm = TRUE)*100), digits=3, scientific=TRUE))
colnames(Table_S2A) <- c("prev_n", "prev", "ab_mean", "ab_sd", "ab_min", "ab_max")
Table_S2A

```

| ##                                 | prev_n   | prev   | ab_mean  | ab_sd    | ab_min   |
|------------------------------------|----------|--------|----------|----------|----------|
| ## Unclassified Unclassified       | 52       | 100.00 | 1.37e+00 | 1.62e+00 | 2.93e-02 |
| ## Archaea Euryarchaeota           | 44       | 84.62  | 1.07e-01 | 4.19e-01 | 0.00e+00 |
| ## Archaea Thaumarchaeota          | 41       | 78.85  | 2.32e-03 | 4.09e-03 | 0.00e+00 |
| ## Bacteria Unclassified           | 34       | 65.38  | 1.56e-04 | 3.33e-04 | 0.00e+00 |
| ## Bacteria Acidobacteria          | 51       | 98.08  | 1.79e-02 | 3.47e-02 | 0.00e+00 |
| ## Bacteria Actinobacteria         | 52       | 100.00 | 9.66e+00 | 1.19e+01 | 2.52e-01 |
| ## Bacteria Armatimonadetes        | 45       | 86.54  | 4.99e-03 | 1.25e-02 | 0.00e+00 |
| ## Bacteria Bacteroidetes          | 52       | 100.00 | 1.09e+01 | 7.89e+00 | 9.05e-01 |
| ## Bacteria Candidate division SR1 | 52       | 100.00 | 2.67e-01 | 7.55e-01 | 1.29e-04 |
| ## Bacteria Chlorobi               | 6        | 11.54  | 1.63e-04 | 6.90e-04 | 0.00e+00 |
| ## Bacteria Chloroflexi            | 51       | 98.08  | 2.38e-02 | 5.32e-02 | 0.00e+00 |
| ## Bacteria Cyanobacteria          | 52       | 100.00 | 4.06e-02 | 1.00e-01 | 1.66e-05 |
| ## Bacteria Deinococcus-Thermus    | 40       | 76.92  | 4.60e-03 | 1.48e-02 | 0.00e+00 |
| ## Bacteria Elusimicrobia          | 35       | 67.31  | 1.79e-02 | 9.52e-02 | 0.00e+00 |
| ## Bacteria Fibrobacteres          | 14       | 26.92  | 4.55e-04 | 2.07e-03 | 0.00e+00 |
| ## Bacteria Firmicutes             | 52       | 100.00 | 3.26e+01 | 1.83e+01 | 4.43e+00 |
| ## Bacteria Fusobacteria           | 52       | 100.00 | 2.86e+01 | 2.24e+01 | 1.31e-02 |
| ## Bacteria Gemmatimonadetes       | 52       | 100.00 | 3.06e-02 | 5.53e-02 | 5.97e-05 |
| ## Bacteria Hydrogenedentes        | 12       | 23.08  | 5.54e-04 | 2.21e-03 | 0.00e+00 |
| ## Bacteria Lentisphaerae          | 52       | 100.00 | 5.05e-01 | 1.60e+00 | 4.99e-05 |
| ## Bacteria Nitrospirae            | 25       | 48.08  | 2.82e-04 | 6.56e-04 | 0.00e+00 |
| ## Bacteria Planctomycetes         | 49       | 94.23  | 7.31e-03 | 1.44e-02 | 0.00e+00 |
| ## Bacteria Proteobacteria         | 52       | 100.00 | 1.27e+01 | 1.46e+01 | 4.50e-01 |
| ## Bacteria SHA-109                | 32       | 61.54  | 8.40e-03 | 3.72e-02 | 0.00e+00 |
| ## Bacteria Saccharibacteria       | 40       | 76.92  | 1.79e-03 | 4.47e-03 | 0.00e+00 |
| ## Bacteria Spirochaetae           | 52       | 100.00 | 6.84e-01 | 1.07e+00 | 5.22e-04 |
| ## Bacteria Synergistetes          | 6        | 11.54  | 4.13e-03 | 2.97e-02 | 0.00e+00 |
| ## Bacteria TM6                    | 2        | 3.85   | 3.35e-06 | 2.00e-05 | 0.00e+00 |
| ## Bacteria Tenericutes            | 52       | 100.00 | 2.53e+00 | 6.91e+00 | 1.03e-02 |
| ## Bacteria Verrucomicrobia        | 47       | 90.38  | 6.06e-03 | 1.35e-02 | 0.00e+00 |
| ## Bacteria WCHB1-60               | 8        | 15.38  | 1.32e-04 | 6.26e-04 | 0.00e+00 |
| ##                                 | ab_max   |        |          |          |          |
| ## Unclassified Unclassified       | 6.52e+00 |        |          |          |          |
| ## Archaea Euryarchaeota           | 2.73e+00 |        |          |          |          |
| ## Archaea Thaumarchaeota          | 1.61e-02 |        |          |          |          |
| ## Bacteria Unclassified           | 1.78e-03 |        |          |          |          |
| ## Bacteria Acidobacteria          | 1.62e-01 |        |          |          |          |
| ## Bacteria Actinobacteria         | 5.93e+01 |        |          |          |          |
| ## Bacteria Armatimonadetes        | 7.80e-02 |        |          |          |          |
| ## Bacteria Bacteroidetes          | 4.00e+01 |        |          |          |          |
| ## Bacteria Candidate division SR1 | 4.53e+00 |        |          |          |          |
| ## Bacteria Chlorobi               | 4.02e-03 |        |          |          |          |
| ## Bacteria Chloroflexi            | 2.69e-01 |        |          |          |          |
| ## Bacteria Cyanobacteria          | 5.02e-01 |        |          |          |          |
| ## Bacteria Deinococcus-Thermus    | 1.02e-01 |        |          |          |          |

```
## Bacteria|Elusimicrobia          6.80e-01
## Bacteria|Fibrobacteres         1.44e-02
## Bacteria|Firmicutes            8.08e+01
## Bacteria|Fusobacteria          7.18e+01
## Bacteria|Gemmatimonadetes     2.37e-01
## Bacteria|Hydrogenedentes       1.42e-02
## Bacteria|Lentisphaerae        7.72e+00
## Bacteria|Nitrospirae          3.25e-03
## Bacteria|Planctomycetes       6.37e-02
## Bacteria|Proteobacteria        6.90e+01
## Bacteria|SHA-109              2.68e-01
## Bacteria|Saccharibacteria     2.87e-02
## Bacteria|Spirochaetae         5.42e+00
## Bacteria|Synergistetes        2.14e-01
## Bacteria|TM6                  1.41e-04
## Bacteria|Tenericutes          4.76e+01
## Bacteria|Verrucomicrobia      7.16e-02
## Bacteria|WCHB1-60             4.13e-03
```

### How many bacterial and archaeal phyla?

```
nrow(subset(Table_S2A, !(rownames(Table_S2A) %in% c("Unclassified|Unclassified", "Bacteria|Unclassified"))))
```

```
## [1] 29
```

### How many bacterial phyla have a prevalence of 100%?

```
nrow(subset(Table_S2A, !(rownames(Table_S2A) %in% c("Unclassified|Unclassified", "Bacteria|Unclassified")) & prev==100))
```

```
## [1] 11
```

### Which bacterial phyla have a relative abundance $\geq 1\%$ ?

```
mean_p <- data.frame(ab_mean=rowMeans(phylum1)*100)
subset(mean_p, ab_mean >= 1 & !(rownames(mean_p) %in% c("Unclassified|Unclassified", "Bacteria|Unclassified")))
```

```
##                               ab_mean
## Bacteria|Actinobacteria  9.662413
## Bacteria|Bacteroidetes 10.852255
## Bacteria|Firmicutes    32.554020
## Bacteria|Fusobacteria  28.574172
## Bacteria|Proteobacteria 12.717570
## Bacteria|Tenericutes   2.531569
```

**FIGURE 2A:**

```

# Subset into Archaea, Bacteria, or unclassified
# Subset out Bacteria phyla that have <1% mean relative abundance
archaea <- colSums(subset(phylum1, rownames(phylum1) %in% grep("Archaea", rownames(phylum1), value=TRUE)))
unclassified <- colSums(subset(phylum1, rownames(phylum1) %in% grep('Unclassified\\|', rownames(phylum1), value=TRUE)))
bacteria <- subset(phylum1, rownames(phylum1) %in% grep('Bacteria', rownames(phylum1), value=TRUE))
low_bacteria <- colSums(subset(bacteria, (rowMeans(bacteria) < 0.01) & (rownames(bacteria) != "Bacteria|Unclassified")))
high_bacteria <- subset(bacteria, rowMeans(bacteria) >= 0.01)
unclass_bacteria <- subset(bacteria, rownames(bacteria) == "Bacteria|Unclassified")
phylum2 <- as.matrix(rbind(high_bacteria, low_bacteria, unclass_bacteria, archaea, unclassified) * 100)
rownames(phylum2) <- c(rownames(high_bacteria), "Low abundance Bacteria", "Unclassified Bacteria", "Archaea", "Unclassified kingdom")
# Order samples by reproductive state and ovarian cycle phase
meta$rep_state <- factor(meta$rep_state, levels = c("PPA", "C", "P", "MC"))
meta$cycle_phase <- factor(meta$cycle_phase, levels = c("A", "S", "O", "D"))
metal <- meta[order(meta$rep_state, meta$cycle_phase, meta$ppa_day, meta$cycle_day, meta$preg_day, na.last=FALSE),]
Figure_2A <- t(t(phylum2)[match(rownames(metal), rownames(t(phylum2))),])
phylum_order <- c("Bacteria|Firmicutes", "Bacteria|Fusobacteria", "Bacteria|Proteobacteria", "Bacteria|Bacteroidetes", "Bacteria|Actinobacteria", "Bacteria|Tenericutes", "Low abundance Bacteria", "Unclassified Bacteria", "Archaea", "Unclassified kingdom")
Figure_2A <- Figure_2A[match(phylum_order, rownames(Figure_2A)),]
# Stacked bar plot
layout(matrix(c(1,2), 1, 2), widths=c(11, 2))
par(xpd=NA)
color_p <- c("#984EA3", "#FF7F00", "#FFFF33", "#4DAF4A", "#377EB8", "#A65628", "#999999", "#FB9A99", "#E41A1C", "black")
barplot(Figure_2A, axes=FALSE, space = 0.3, axisnames = FALSE, col=color_p)
axis(2, at=c(0, 20, 40, 60, 80, 100), pos=-0.5, cex.axis=1.5, ylab="Relative phylum abundance (%)")
mtext("Relative phylum abundance (%)", side=2, line=1.5, cex=1.5)
legend(x=68, y=100, legend=rev(rownames(Figure_2A)), fill=rev(color_p), cex=1)
text(x=-7, y=105, "A", cex=2.5)
rect(c(0.3,14.7,25.05,36.8,41.9,51.1,66.6),rep(-5,7),c(14.4,24.75,36.45,41.6,50.8,66.3,67.7),rep(-0.5,7))
mtext(c("PPA", "A", "S", "O", "D", "P"), 1, at=c(7.35,19.75,30.9,39.4,46.6,58.9), line=0.05, cex=1.4)
mtext("MC", 1, at=67.15, line=-0.05, cex=0.75, las=2, padj=0.5)
mtext(c("a", "b", "c", "d", "d", "c", "b", "a"), 3, at=c(3.4, 7.35,20.25,24.25,33.3,54.1,65.83,67.15), line=0, cex=1.2)

```



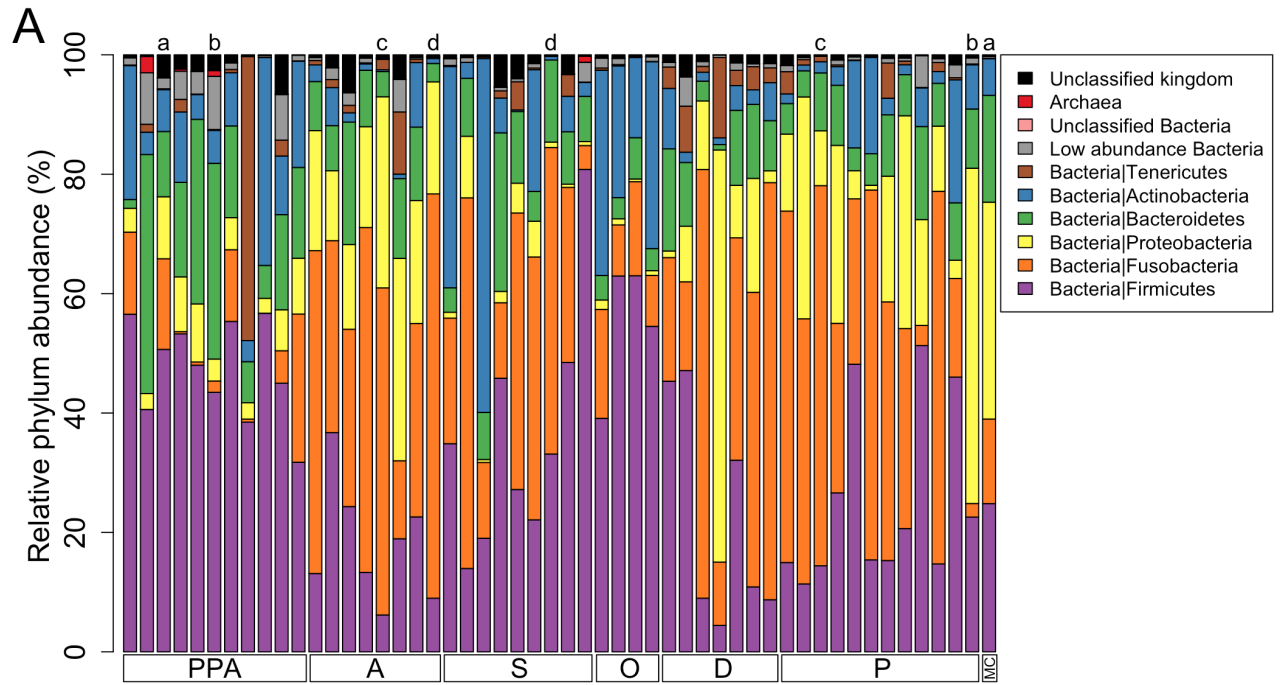

**Calculate data for TABLE S2B:**

```

# Keep only genera with a prevalence of 100% and classified to genus level
genus_prev <- as.data.frame(rowSums(genus != 0))
colnames(genus_prev) <- "prevalence_n"
genus_prev100 <- subset(genus_prev, prevalence_n==52 & !(rownames(genus_prev) %
in% grep("Other|g__uncultured|g__uncultured_bacterium$", rownames(genus_prev),
value=TRUE)))
genus100 <- subset(genus, rownames(genus) %in% rownames(genus_prev100))
rownames(genus100) <- gsub("^.*g__", "", rownames(genus100))
rownames(genus100) <- gsub("_", " ", rownames(genus100))
# Calculate genus prevalence and % relative abundance (mean, SD, minimum, and m
aximum)
Table_S2B <- cbind(as.data.frame(rowSums(genus100 != 0)),
round(as.data.frame(rowSums(genus100 != 0))/ncol(genus100)*1
00, 2),
format(as.data.frame(rowMeans(genus100)*100), digits=3, scie
ntific=TRUE),
format(as.data.frame(apply(genus100, 1, sd, na.rm=TRUE)*100)
, digits=3, scientific=TRUE),
format(as.data.frame(apply(genus100, 1, min, na.rm=TRUE)*100
), digits=3, scientific=TRUE),
format(as.data.frame(apply(genus100, 1, max, na.rm = TRUE)*1
00), digits=3, scientific=TRUE))
colnames(Table_S2B) <- c("prev_n", "prev", "ab_mean", "ab_sd", "ab_min", "ab_ma
x")
Table_S2B

```

| ##                               | prev_n | prev | ab_mean  | ab_sd    | ab_min   |
|----------------------------------|--------|------|----------|----------|----------|
| ## Arcanobacterium               | 52     | 100  | 4.16e-01 | 1.26e+00 | 3.22e-05 |
| ## Mobiluncus                    | 52     | 100  | 6.74e-01 | 1.36e+00 | 7.74e-05 |
| ## Bifidobacterium               | 52     | 100  | 4.52e+00 | 1.05e+01 | 3.41e-04 |
| ## Corynebacterium               | 52     | 100  | 9.42e-01 | 2.67e+00 | 2.41e-04 |
| ## Corynebacterium 1             | 52     | 100  | 1.64e+00 | 3.77e+00 | 1.41e-03 |
| ## Micrococcus                   | 52     | 100  | 3.78e-01 | 7.74e-01 | 3.80e-05 |
| ## Atopobium                     | 52     | 100  | 5.94e-01 | 1.64e+00 | 1.26e-04 |
| ## Porphyromonas                 | 52     | 100  | 6.03e+00 | 5.72e+00 | 3.66e-02 |
| ## Prevotella                    | 52     | 100  | 1.60e+00 | 3.05e+00 | 6.97e-05 |
| ## Prevotella 9                  | 52     | 100  | 5.27e-01 | 1.94e+00 | 6.66e-05 |
| ## Rikenellaceae RC9 gut group   | 52     | 100  | 1.07e+00 | 2.45e+00 | 1.04e-04 |
| ## Tumebacillus                  | 52     | 100  | 2.73e-02 | 5.52e-02 | 2.98e-05 |
| ## Bacillus                      | 52     | 100  | 9.08e-03 | 1.31e-02 | 2.47e-05 |
| ## Aerococcus                    | 52     | 100  | 3.05e+00 | 5.18e+00 | 3.31e-04 |
| ## Eremococcus                   | 52     | 100  | 9.22e-02 | 1.27e-01 | 8.95e-05 |
| ## Facklamia                     | 52     | 100  | 1.29e+00 | 2.42e+00 | 6.86e-04 |
| ## Atopostipes                   | 52     | 100  | 3.54e-01 | 5.97e-01 | 1.79e-04 |
| ## Trichococcus                  | 52     | 100  | 1.48e+00 | 4.39e+00 | 1.39e-04 |
| ## Streptococcus                 | 52     | 100  | 2.86e+00 | 1.11e+01 | 3.31e-04 |
| ## Christensenellaceae R-7 group | 52     | 100  | 2.79e-01 | 4.05e-01 | 1.33e-03 |
| ## Anaerococcus                  | 52     | 100  | 2.82e+00 | 3.26e+00 | 8.13e-02 |
| ## Ezakiella                     | 52     | 100  | 3.04e+00 | 4.68e+00 | 1.13e-03 |
| ## Helcococcus                   | 52     | 100  | 1.39e+00 | 2.04e+00 | 1.37e-03 |
| ## Murdochiella                  | 52     | 100  | 7.82e-02 | 1.19e-01 | 2.56e-04 |
| ## Parvimonas                    | 52     | 100  | 1.45e+00 | 1.63e+00 | 8.88e-04 |
| ## Peptoniphilus                 | 52     | 100  | 2.88e+00 | 2.54e+00 | 1.93e-01 |
| ## Catonella                     | 52     | 100  | 1.67e+00 | 5.18e+00 | 2.10e-04 |
| ## Peptococcus                   | 52     | 100  | 1.27e-01 | 1.94e-01 | 4.65e-04 |
| ## Peptoclostridium              | 52     | 100  | 8.05e-01 | 1.17e+00 | 5.57e-04 |
| ## Fastidiosipila                | 52     | 100  | 1.93e+00 | 3.94e+00 | 1.20e-02 |
| ## Ruminococcaceae UCG-005       | 52     | 100  | 1.44e-01 | 4.34e-01 | 2.84e-05 |
| ## Ruminococcaceae UCG-014       | 52     | 100  | 3.79e-01 | 5.97e-01 | 2.39e-04 |
| ## Saccharofermentans            | 52     | 100  | 4.68e-02 | 6.20e-02 | 2.79e-04 |
| ## Dialister                     | 52     | 100  | 8.08e-01 | 1.28e+00 | 1.89e-03 |
| ## Negativicoccus                | 52     | 100  | 3.64e-01 | 5.13e-01 | 3.95e-04 |
| ## Fusobacterium                 | 52     | 100  | 1.37e+01 | 1.32e+01 | 3.42e-03 |
| ## Sneathia                      | 52     | 100  | 9.11e+00 | 1.31e+01 | 6.30e-04 |
| ## Sphingomonas                  | 52     | 100  | 3.41e-02 | 1.17e-01 | 2.78e-05 |
| ## Campylobacter                 | 52     | 100  | 4.97e+00 | 6.93e+00 | 2.40e-01 |
| ## Haemophilus                   | 52     | 100  | 7.26e+00 | 1.29e+01 | 7.84e-04 |
| ## Treponema 2                   | 52     | 100  | 5.97e-01 | 1.05e+00 | 4.53e-04 |
| ## Acholeplasma                  | 52     | 100  | 9.55e-01 | 1.97e+00 | 4.20e-05 |
| ## Mycoplasma                    | 52     | 100  | 1.25e+00 | 6.60e+00 | 1.07e-04 |
| ##                               |        |      | ab_max   |          |          |
| ## Arcanobacterium               |        |      | 7.40e+00 |          |          |

|                                  |          |
|----------------------------------|----------|
| ## Mobiluncus                    | 5.92e+00 |
| ## Bifidobacterium               | 5.31e+01 |
| ## Corynebacterium               | 1.45e+01 |
| ## Corynebacterium 1             | 2.17e+01 |
| ## Micrococcus                   | 4.39e+00 |
| ## Atopobium                     | 1.03e+01 |
| ## Porphyromonas                 | 2.97e+01 |
| ## Prevotella                    | 1.24e+01 |
| ## Prevotella 9                  | 1.30e+01 |
| ## Rikenellaceae RC9 gut group   | 1.26e+01 |
| ## Tumebacillus                  | 3.41e-01 |
| ## Bacillus                      | 5.10e-02 |
| ## Aerococcus                    | 2.76e+01 |
| ## Eremococcus                   | 7.37e-01 |
| ## Facklamia                     | 1.18e+01 |
| ## Atopostipes                   | 3.76e+00 |
| ## Trichococcus                  | 1.98e+01 |
| ## Streptococcus                 | 6.88e+01 |
| ## Christensenellaceae R-7 group | 1.95e+00 |
| ## Anaerococcus                  | 1.77e+01 |
| ## Ezakiella                     | 2.79e+01 |
| ## Helcococcus                   | 9.44e+00 |
| ## Murdochiella                  | 6.67e-01 |
| ## Parvimonas                    | 5.74e+00 |
| ## Peptoniphilus                 | 9.96e+00 |
| ## Catonella                     | 2.52e+01 |
| ## Peptococcus                   | 7.81e-01 |
| ## Peptoclostridium              | 5.13e+00 |
| ## Fastidiosipila                | 2.58e+01 |
| ## Ruminococcaceae UCG-005       | 2.32e+00 |
| ## Ruminococcaceae UCG-014       | 2.48e+00 |
| ## Saccharofermentans            | 2.68e-01 |
| ## Dialister                     | 6.08e+00 |
| ## Negativicoccus                | 2.69e+00 |
| ## Fusobacterium                 | 5.07e+01 |
| ## Sneathia                      | 6.69e+01 |
| ## Sphingomonas                  | 7.95e-01 |
| ## Campylobacter                 | 3.35e+01 |
| ## Haemophilus                   | 6.81e+01 |
| ## Treponema 2                   | 5.41e+00 |
| ## Acholeplasma                  | 1.01e+01 |
| ## Mycoplasma                    | 4.76e+01 |

**How many bacterial genera have a prevalence of 100%?**

```
nrow(Table_S2B)
```

## [1] 43

**FIGURE 2B:**

```

# Subset out genera that have >1% mean relative abundance
mean_g <- data.frame(ab_mean=rowMeans(genus)*100)
mean_g1 <- subset(mean_g, (ab_mean >= 1) & (rownames(mean_g) != "Unassigned;Other;Other;Other;Other;Other"))
mean_g2 <- mean_g1[order(-mean_g1$ab_mean), , drop = FALSE]
genus_1 <- droplevels(subset(genus, rownames(genus) %in% rownames(mean_g2)))
genus_1 <- genus_1[match(rownames(mean_g2), rownames(genus_1)),]
# Combine bacterial genera with <1% relative abundance
genus_mean_low <- droplevels(subset(mean_g, ab_mean < 1))
bacteria_mean_low <- subset(genus_mean_low, (row(genus_mean_low) %in% grep("k__Bacteria;", rownames(genus_mean_low))) & (rownames(genus_mean_low) != "k__Bacteria;Other;Other;Other;Other;Other;Other"))
bacteria_low <- colSums(droplevels(subset(genus, rownames(genus) %in% rownames(bacteria_mean_low))))
bacteria_unclass <- colSums(droplevels(subset(genus, rownames(genus)=="k__Bacteria;Other;Other;Other;Other;Other;Other")))
# Combine archaea genera
archaea_mean <- subset(genus_mean_low, row(genus_mean_low) %in% grep("k__Archaea;", rownames(genus_mean_low)))
archaea <- colSums(droplevels(subset(genus, rownames(genus) %in% rownames(archaea_mean))))
# Grep unclassified row
unclassified <- genus["Unassigned;Other;Other;Other;Other;Other",]
# Combine
genus1 <- rbind(genus_1, bacteria_low, bacteria_unclass, archaea, unclassified)
rownames(genus1) <- c(rownames(genus_1), "Low abundance Bacteria (mean < 1%)", "Unclassified Bacteria", "Archaea", "Unclassified kingdom")
genus2 <- as.matrix(genus1*100)
# Shorten row names
rownames(genus2) <- gsub("k__Bacteria;p__Fusobacteria;c__Fusobacteriia;o__Fusobacteriales;f__Leptotrichiaceae;Other", "Unclassified Leptotrichiaceae", rownames(genus2))
rownames(genus2) <- sub(".*g__", "", rownames(genus2))
rownames(genus2) <- sub("_", " ", rownames(genus2))
rownames(genus2) <- sub("RC9_gut_group", "RC9 gut group", rownames(genus2))
# Order samples by reproductive state and cycle phase
Figure_2B <- t(t(genus2)[match(rownames(metal), rownames(t(genus2))),])
# Heatmap
library(gplots)
library(RColorBrewer)
my_palette <- colorRampPalette(rev(brewer.pal(11,"Spectral")))(99)
my_breaks <- c(seq(-4,-2,length=20), seq(-1.99,1,length=60), seq(1.01,2,length=20))
layout(matrix(c(2,1), 1, 2), widths=c(5, 5))
par(oma=c(0,1,0,5))
heatmap.2(log10(Figure_2B[c(1:22),]), Rowv=TRUE, Colv=FALSE, dendrogram="none",

```

```

density.info="none",
  trace="none", col=my_palette, breaks=my_breaks, symkey=FALSE, colsep=
c(11, 19, 28, 32, 39, 51), sepcolor="white", sepwidth=c(0.3,0.02), labCol=NA, k
ey=TRUE, lhei=c(0.1,0.35,0.05), lmat=rbind(c(0,0,4), c(2,1,0), c(0,3,0)), lwid=
c(0.1, 4.5, 1.5), key.xlab=expression(paste(Log[10], " relative abundance", sep=
"")), key.title=NA, cexRow=1.75, key.par=list(cex.lab=1.5, cex.axis=1.5),
  add.expr = c({rect(c(0.55,11.8,19.8,28.8,32.9,39.9,51.8),rep(-0.75,7)
,c(11.5,19.5,28.5,32.6,39.6,51.5,52.8),rep(0.35,7),xpd=TRUE)},
  {mtext(c("PPA", "A", "S", "O", "D", "P"), 1.5, at=c(6.03,15.65,24.15,3
0.75,36.3,45.7), line=-0.15, cex=1.3, padj = 0.8)},
  {mtext("MC", 1, at=52.3, line=0.3, cex=0.75, las=2, padj=0.5)},
  {mtext(c("a", "b", "c", "d", "d", "c", "b", "a"), 3, at=c(3, 6, 1
6, 19, 26, 42, 51, 52.2), line=0, cex =1.2)},
  {rect(c(0.55,11.865,19.85,28.88,32.88,39.88,51.88),0.5,c(11.44,19
.45,28.45,32.45,39.45,51.44,52.54),22.5, xpd=TRUE, col=NA)},
  {mtext("B", 2, cex=2.5, xpd=TRUE, las=1, at=c(24))}))

```

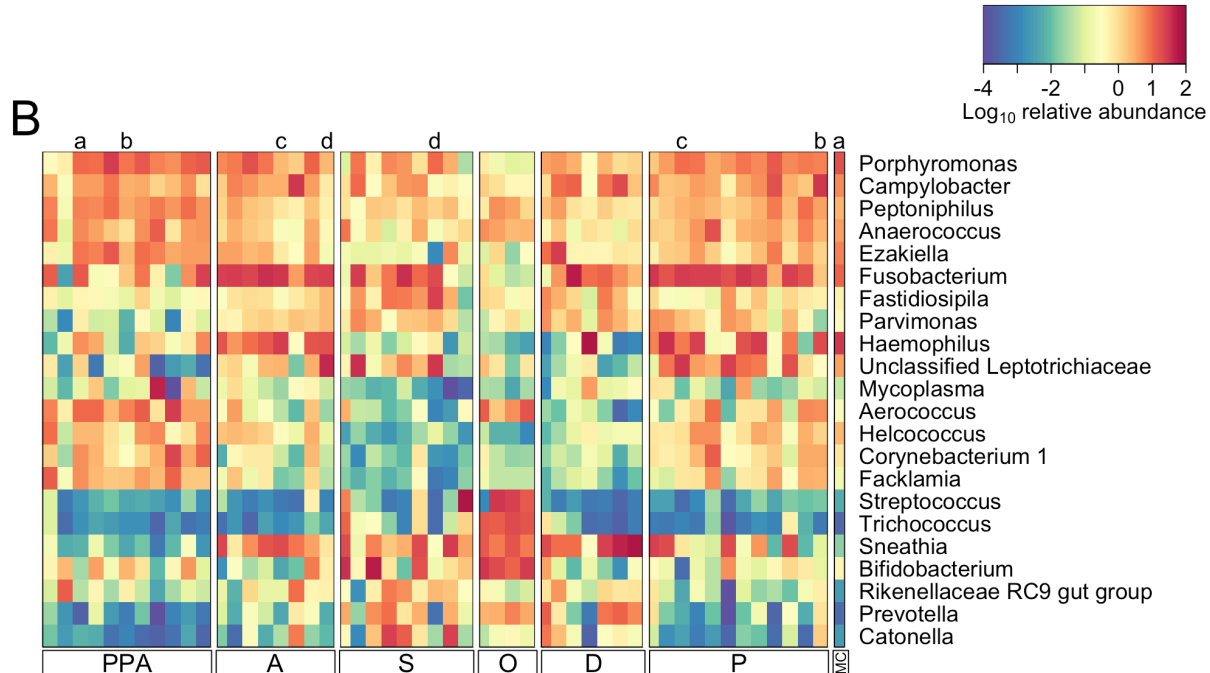

**What is the prevalence and relative abundance of *Lactobacillus* spp.?**

```

# Prevalence
lacto <- t(genus[grep(".*g_Lactobacillus", rownames(genus)), ])
sum(lacto != 0)/nrow(lacto)*100

```

```
## [1] 84.61538
```

```
# Median relative abundance  
median(lacto)*100
```

```
## [1] 0.0006315
```

```
# Relative abundance range  
range(lacto)*100
```

```
## [1] 0.0000000 0.9324851
```

### What is the relative abundance of the order Lactobacillales?

```
lacto1 <- order[grep(".*;o__Lactobacillales", rownames(order)), ]  
# Mean relative abundance  
rowMeans(lacto1)*100
```

```
## k__Bacteria;p__Firmicutes;c__Bacilli;o__Lactobacillales  
##                                     10.41283
```

```
# Relative abundance standard deviation  
sd(lacto1)*100
```

```
## [1] 16.34909
```

### What percentage of OTUs could not be classified beyond the kingdom level?

```
library(splitstackshape) #version 1.4.2  
otu1 <- as.data.frame(cSplit(otu, "taxonomy", sep=';'))  
rownames(otu1) <- rownames(otu)  
unclass <- subset(otu1, !is.na(taxonomy_1) & is.na(taxonomy_2))  
nrow(unclass)/nrow(otu)*100
```

```
## [1] 11.80084
```

### What percentage of total reads were from unclassified OTUs?

```
sum(unclass[1:52])/sum(otu[1:52])*100
```



```
## [1] 1.522719
```

### What percentage of unclassified OTUs appear in more than one sample?

```
# Use OTU table with all OTUs (not just those that occur in more than one sample)  
otu_all_unclass <- subset(otu_all, rownames(otu_all) %in% rownames(unclass))  
unclass_prev <- as.data.frame(rowSums(otu_all_unclass[1:52] > 0), drop=FALSE)  
names(unclass_prev) <- "prevalence"  
nrow(subset(unclass_prev, prevalence > 1))/nrow(unclass)*100
```

```
## [1] 100
```

### How does the prevalence distribution of unclassified OTUs compare to the distribution of classified OTUs?

```
# Distribution of classified OTU prevalence  
class_prev <- as.data.frame(rowSums(otu[1:52] > 0))  
hist(class_prev[,1], breaks=16, ylab='Relative frequency of classified OTUs', x  
lab='Prevalence of classified OTUs', main=NA, col="gray", cex.axis=1.5, cex.lab  
=1.25, freq=FALSE, ylim=c(0,0.08))
```

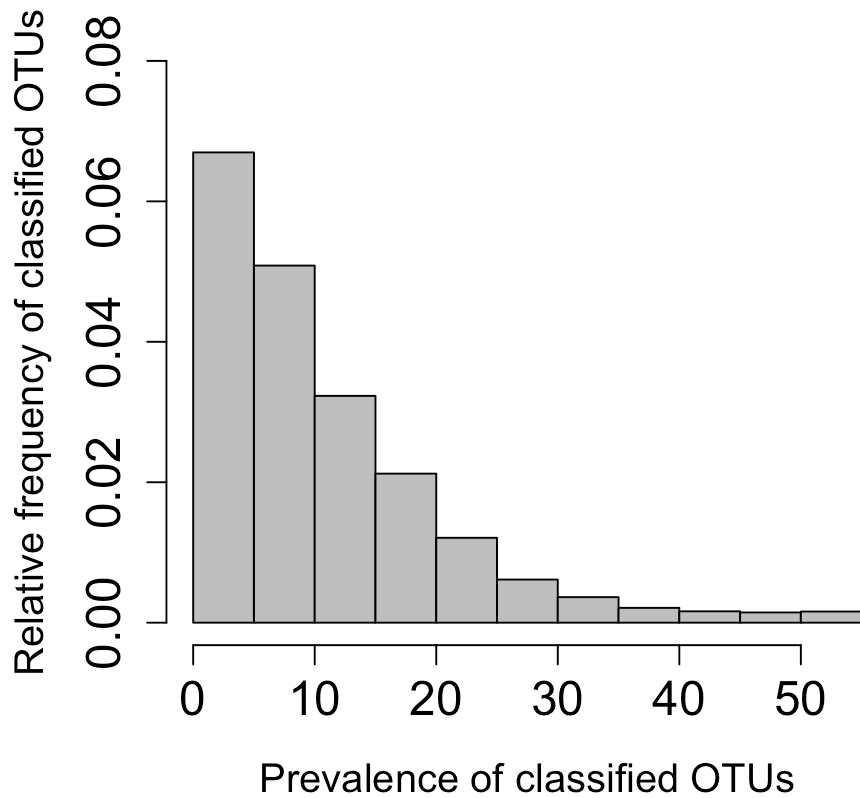

```
# Distribution of classified OTU prevalence  
unclass_prev <- as.data.frame(rowSums(unclass[1:52] > 0))  
hist(unclass_prev[,1], breaks=16, ylab='Relative frequency of unclassified OTUs'  
, xlab='Prevalence of unclassified OTUs', main=NA, col="gray", cex.axis=1.5, c  
ex.lab=1.25, freq=FALSE, ylim=c(0,0.08))
```

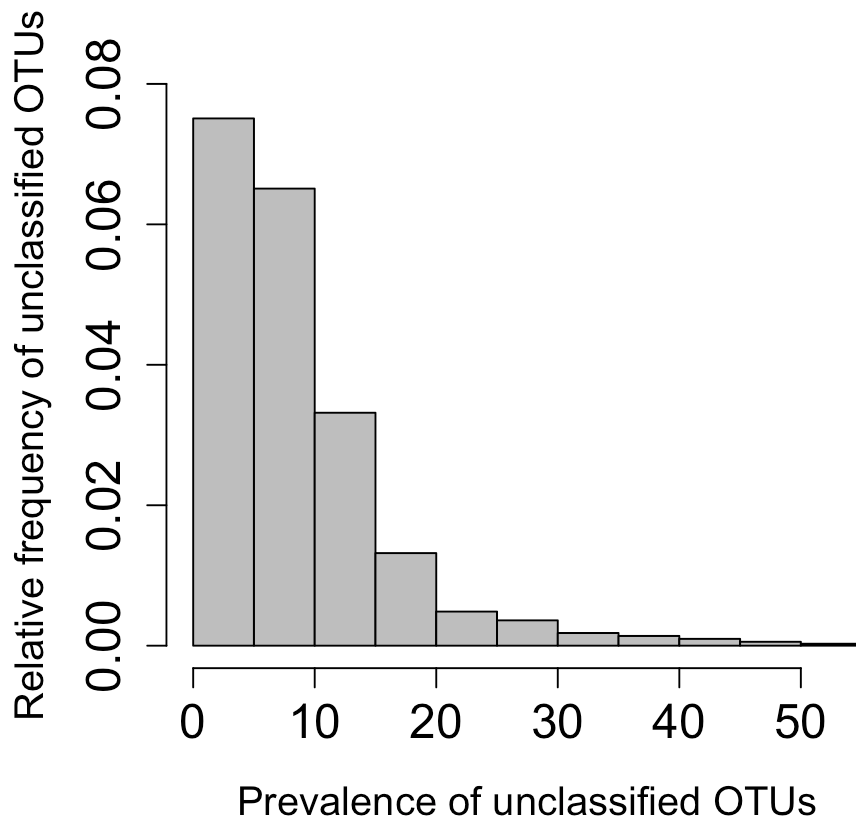

## Alpha diversity

### What host factors predict alpha diversity?

We constructed multivariate linear regression models for both OTU richness and Shannon's diversity index. The following factors were fixed effects: sequencing read count (to control for variation in sequencing depth between samples), age, reproductive state or ovarian cycle phase, dominance rank, presence or absence of rainfall in the 30 days prior to sample collection, the number of individuals in a female's social group at sample collection (i.e. social group size), and level of promiscuity, estimated using the average number of consortship partners per ovarian cycle.

```
# Calculate OTU richness and Shannon's diversity index
library(vegan) #version 2.4-0
library(plyr) #version 1.8.4
otu_matrix <- t(as.matrix(otu[1:52]))
richness <- data.frame(richness=specnumber(otu_matrix), rn=row.names(otu_matrix
))
shannon <- data.frame(多样性(otu_matrix, index="shannon", base=2), rn=row.names(otu_matrix))
colnames(shannon) <- c("shannon", "rn")
meta1 <- join_all(list(data.frame(meta, rn=row.names(meta)), richness, shannon)
, by="rn", type='full')
rownames(meta1) <- meta1$rn
meta1$rn <- NULL
```

**Should we include baboon ID as a random effect in the alpha diversity linear regression models?**

Four baboons were sampled twice.

```

library(cluster) #version 2.0.4
# Do samples from the same baboon have more similar alpha diversity?
# Dataframe of all possible sample dyads:
bid <- data.frame(sname=meta$baboon_id)
bid_gower <- daisy(bid, metric="gower")
sid <- data.frame(baboon_id=meta$baboon_id, row.names=row.names(meta))
all_dyads <- data.frame(t(combn(row.names(sid),2)), as.factor(as.numeric(bid_gower)))
names(all_dyads) <- c("sample_id1", "sample_id2", "same_baboon")
# Control alpha diversity for read count, reproductive state, and cycle phase.
metal$"rep_cycle" <- ifelse(metal$rep_state=="MC","MC",ifelse(metal$rep_state=="P","P",ifelse(metal$rep_state=="PPA","PPA",ifelse(metal$cycle_phase=="A","A",ifelse(metal$cycle_phase=="S","S",ifelse(metal$cycle_phase=="O","O","D"))))))
metal$"richness_residuals" <- residuals(lm(richness ~ read_count + rep_cycle, data=metal))
metal$"shannon_residuals" <- residuals(lm(shannon ~ read_count + rep_cycle, data=metal))
all_dyads1 <- merge(all_dyads, metal[,c("richness_residuals", "shannon_residuals")], by.x="sample_id1", by.y="row.names")
all_dyads2 <- merge(all_dyads1, metal[,c("richness_residuals", "shannon_residuals")], by.x="sample_id2", by.y="row.names")
all_dyads2$"richness" <- abs(all_dyads2$richness_residuals.x-all_dyads2$richness_residuals.y)
all_dyads2$"shannon" <- abs(all_dyads2$shannon_residuals.x-all_dyads2$shannon_residuals.y)
# Because sample sizes are not equal, use Wilcoxon rank-sum tests (Mann-Whitney U tests)
# OTU Richness
wilcox.test(all_dyads2$"richness" ~ all_dyads2$same_baboon)

```

```

##
## Wilcoxon rank sum test with continuity correction
##
## data: all_dyads2$richness by all_dyads2$same_baboon
## W = 1725, p-value = 0.2297
## alternative hypothesis: true location shift is not equal to 0

```

```

# Shannon's diversity index
wilcox.test(all_dyads2$"shannon" ~ all_dyads2$same_baboon)

```

```
##
## Wilcoxon rank sum test with continuity correction
##
## data: all_dyads2$shannon by all_dyads2$same_baboon
## W = 2876, p-value = 0.7621
## alternative hypothesis: true location shift is not equal to 0
```

Based on Wilcoxon rank sum tests (Mann–Whitney U tests), samples from the same baboon are no more similar to each other in terms of alpha diversity than samples from different baboons.

## FIGURE S2

```
library(reshape) #version 0.8.5
library(ggplot2) #version 2.1.0
all_dyads_melt <- melt(all_dyads2[,c("sample_id1", "sample_id2", "same_baboon", "
richness", "shannon")])
all_dyads_melt$variable <- gsub("richness", "OTU\nRichness", all_dyads_melt$var
iable)
all_dyads_melt$variable <- gsub("shannon", "Shannon's\nDiversity", all_dyads_me
lt$variable)
ggplot(data=all_dyads_melt, aes(x=variable, y=value)) +
  geom_boxplot(aes(fill=same_baboon), width=0.75, position=position_dodge(0.75)
) +
  facet_wrap( ~ variable, scales="free", ncol=5) +
  ylab("Absolute difference in alpha diversity (residuals)") + xlab("") +
  theme(plot.background=element_blank(), panel.grid.major=element_blank(), pane
l.grid.minor=element_blank(), panel.border=element_rect(fill=NA, colour="black"
, size=1), panel.background=element_blank(), axis.line=element_blank(), legend.
position="right", axis.title.x=element_text(color="black", size=16), axis.title
.y=element_text(color="black", size=16, hjust=0.25), axis.text.x=element_blank(
), axis.text.y=element_text(size=14, lineheight=0.9, color="black"), strip.text
.x=element_text(size=12, colour="black"), legend.text=element_text(size=14), le
gend.background=element_rect(fill="white", size=.5, linetype="solid", color="bl
ack"), legend.title=element_blank()) +
  scale_fill_manual(values=c("white", "gray"), labels=c("Same Individual", "Diffe
rent Individual"), name="")
```

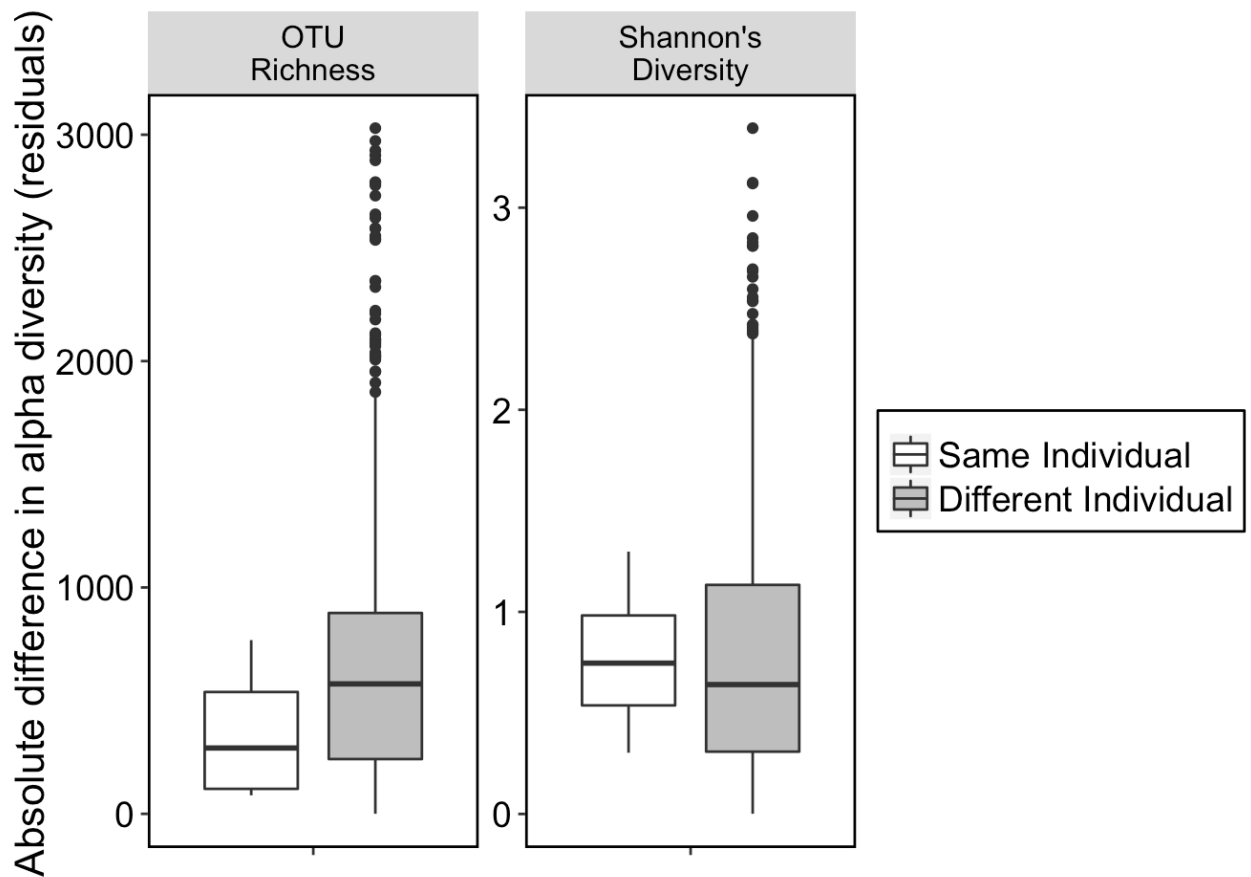

**Calculate data for TABLE S3:**

```

library(MASS) #version 7.3-45
# Remove the female who is miscarrying
meta_noMC <- droplevels(subset(metal, rep_state != "MC"))
# Scale numerical factors
meta_noMC$age.scaled <- as.numeric(scale(meta_noMC$age, scale=TRUE))
meta_noMC$absolute_rank.scaled <- as.numeric(scale(meta_noMC$absolute_rank, scale=TRUE))
meta_noMC$read_count.scaled <- as.numeric(scale(meta_noMC$read_count, scale=TRUE))
meta_noMC$social_grp_size.scaled <- as.numeric(scale(meta_noMC$social_grp_size, scale=TRUE))
meta_noMC$promiscuity.scaled <- as.numeric(scale(meta_noMC$promiscuity, scale=TRUE))
# Linear regression for OTU richness
lm_full_R <- lm(richness ~ (read_count.scaled + age.scaled + rep_state + rainfall + absolute_rank.scaled + promiscuity.scaled + social_grp_size.scaled), data=meta_noMC)
stepAIC(lm_full_R, direction="backward", trace=0)

```

```
##
## Call:
## lm(formula = richness ~ read_count.scaled + rainfall, data = meta_noMC)
##
## Coefficients:
##      (Intercept)  read_count.scaled      rainfallR
##      2932.2          563.1          -467.6
```

```
# Final model for OTU richness
summary(lm(richness ~ (read_count.scaled + rainfall), data=meta_noMC))
```

```
##
## Call:
## lm(formula = richness ~ (read_count.scaled + rainfall), data = meta_noMC)
##
## Residuals:
##      Min       1Q   Median       3Q      Max
## -1223.23  -350.77   -91.13   253.08  1727.37
##
## Coefficients:
##              Estimate Std. Error t value Pr(>|t|)
## (Intercept)      2932.2      128.8  22.766 < 2e-16 ***
## read_count.scaled    563.1       89.5   6.292 8.98e-08 ***
## rainfallR          -467.6      177.6  -2.633  0.0113 *
## ---
## Signif. codes:  0 '***' 0.001 '**' 0.01 '*' 0.05 '.' 0.1 ' ' 1
##
## Residual standard error: 628.8 on 48 degrees of freedom
## Multiple R-squared:  0.4744, Adjusted R-squared:  0.4525
## F-statistic: 21.66 on 2 and 48 DF,  p-value: 1.977e-07
```

```
# Linear regression for Shannon's diversity index
lm_full_H <- lm(shannon ~ (read_count.scaled + age.scaled + rep_state + rainfall + absolute_rank.scaled + promiscuity.scaled + social_grp_size.scaled), data=meta_noMC)
stepAIC(lm_full_H, direction="backward", trace=0)
```



```
##
## Call:
## lm(formula = shannon ~ read_count.scaled + rep_state + rainfall +
##     promiscuity.scaled + social_grp_size.scaled, data = meta_noMC)
##
## Coefficients:
##           (Intercept)      read_count.scaled      rep_stateC
##           5.5979           0.4157           -1.7263
##           rep_stateP      rainfallR      promiscuity.scaled
##           -0.9182           -0.3319           -0.1525
## social_grp_size.scaled
##           -0.3014
```

```
summary(lm(shannon ~ (read_count.scaled + age.scaled + rep_state + rainfall + a
bsolute_rank.scaled + promiscuity.scaled + social_grp_size.scaled), data=meta_n
oMC))
```

```

##
## Call:
## lm(formula = shannon ~ (read_count.scaled + age.scaled + rep_state +
##      rainfall + absolute_rank.scaled + promiscuity.scaled + social_grp_size.s
scaled),
##      data = meta_noMC)
##
## Residuals:
##      Min       1Q   Median       3Q      Max
## -1.4969 -0.4512 -0.1016  0.4630  1.4915
##
## Coefficients:
##              Estimate Std. Error t value Pr(>|t|)
## (Intercept)      5.59870    0.25755   21.739 < 2e-16 ***
## read_count.scaled  0.41445    0.12874    3.219  0.00248 **
## age.scaled       -0.02778    0.11521   -0.241  0.81062
## rep_stateC       -1.71574    0.31412   -5.462  2.35e-06 ***
## rep_stateP       -0.94702    0.31904   -2.968  0.00493 **
## rainfallR        -0.33144    0.21968   -1.509  0.13885
## absolute_rank.scaled -0.05910    0.13095   -0.451  0.65406
## promiscuity.scaled -0.16246    0.11617   -1.399  0.16929
## social_grp_size.scaled -0.26448    0.13173   -2.008  0.05113 .
## ---
## Signif. codes:  0 '***' 0.001 '**' 0.01 '*' 0.05 '.' 0.1 ' ' 1
##
## Residual standard error: 0.7478 on 42 degrees of freedom
## Multiple R-squared:  0.5499, Adjusted R-squared:  0.4642
## F-statistic: 6.414 on 8 and 42 DF,  p-value: 1.976e-05

```

```

# Remove age, rainfall, absolute rank, and promiscuity because Pr(>|t|) > 0.05
# What happens to social group size, which is borderline significant?
summary(lm(shannon ~ (read_count.scaled + rep_state + social_grp_size.scaled),
data=meta_noMC))

```

```
##
## Call:
## lm(formula = shannon ~ (read_count.scaled + rep_state + social_grp_size.scaled),
##     data = meta_noMC)
##
## Residuals:
##      Min       1Q   Median       3Q      Max
## -1.3437 -0.5043 -0.1276  0.5277  1.6622
##
## Coefficients:
##              Estimate Std. Error t value Pr(>|t|)
## (Intercept)      5.4309     0.2366  22.954 < 2e-16 ***
## read_count.scaled  0.3761     0.1247   3.016  0.00417 **
## rep_stateC      -1.7188     0.2969  -5.789 5.99e-07 ***
## rep_stateP      -0.9724     0.3114  -3.122  0.00310 **
## social_grp_size.scaled -0.3252     0.1094  -2.972  0.00470 **
## ---
## Signif. codes:  0 '***' 0.001 '**' 0.01 '*' 0.05 '.' 0.1 ' ' 1
##
## Residual standard error: 0.7448 on 46 degrees of freedom
## Multiple R-squared:  0.511, Adjusted R-squared:  0.4684
## F-statistic: 12.02 on 4 and 46 DF, p-value: 9.128e-07
```

## Calculate data for TABLE S4:

```
meta_C <- droplevels(subset(meta_noMC, rep_state == "C"))
# Linear regression for OTU richness
lm_full_R_C <- lm(richness ~ (read_count.scaled + age.scaled + cycle_phase + rainfall + absolute_rank.scaled + promiscuity.scaled + social_grp_size.scaled), data=meta_C)
stepAIC(lm_full_R_C, direction="backward", trace=0)
```

```
##
## Call:
## lm(formula = richness ~ read_count.scaled + cycle_phase + rainfall,
##     data = meta_C)
##
## Coefficients:
##      (Intercept)  read_count.scaled  cycle_phases
##          3288.52           721.47          -731.57
##      cycle_phase0  cycle_phaseD      rainfallR
##          31.95          -863.91          -325.83
```

```
summary(lm(richness ~ (read_count.scaled + cycle_phase + rainfall), data=meta_C
))
```

```
##
## Call:
## lm(formula = richness ~ (read_count.scaled + cycle_phase + rainfall),
##     data = meta_C)
##
## Residuals:
##      Min       1Q   Median       3Q      Max
## -1236.06  -288.07   -38.04   217.52  1842.66
##
## Coefficients:
##              Estimate Std. Error t value Pr(>|t|)
## (Intercept)    3288.52    273.05  12.044 3.71e-11 ***
## read_count.scaled  721.47    135.92   5.308 2.51e-05 ***
## cycle_phases    -731.57    363.92  -2.010  0.0568 .
## cycle_phaseO     31.95    399.16   0.080  0.9369
## cycle_phaseD    -863.91    364.71  -2.369  0.0270 *
## rainfallR      -325.83    254.92  -1.278  0.2145
## ---
## Signif. codes:  0 '***' 0.001 '**' 0.01 '*' 0.05 '.' 0.1 ' ' 1
##
## Residual standard error: 622.2 on 22 degrees of freedom
## Multiple R-squared:  0.6182, Adjusted R-squared:  0.5315
## F-statistic: 7.125 on 5 and 22 DF,  p-value: 0.0004245
```

```
# Remove rainfall from final model because Pr(>|t|) > 0.05
# Final model for OTU richness
summary(lm(richness ~ (read_count.scaled + cycle_phase), data=meta_C))
```

```
##
## Call:
## lm(formula = richness ~ (read_count.scaled + cycle_phase), data = meta_C)
##
## Residuals:
##      Min       1Q   Median       3Q      Max
## -1049.02  -235.07   24.79   160.59  2047.47
##
## Coefficients:
##              Estimate Std. Error t value Pr(>|t|)
## (Intercept)      3093.7      229.6  13.472 2.13e-12 ***
## read_count.scaled    743.4      136.7   5.439 1.58e-05 ***
## cycle_phases      -777.6      367.1  -2.118  0.0452 *
## cycle_phase0       140.5      395.4   0.356  0.7255
## cycle_phaseD      -920.0      367.0  -2.507  0.0197 *
## ---
## Signif. codes:  0 '***' 0.001 '**' 0.01 '*' 0.05 '.' 0.1 ' ' 1
##
## Residual standard error: 630.7 on 23 degrees of freedom
## Multiple R-squared:  0.5899, Adjusted R-squared:  0.5186
## F-statistic:  8.27 on 4 and 23 DF,  p-value: 0.0002752
```

```
# Linear regression for Shannon's diversity index
lm_full_H_C <- lm(shannon ~ (read_count.scaled + age.scaled + cycle_phase + rainfall + absolute_rank.scaled + promiscuity.scaled + social_grp_size.scaled), data=meta_C)
stepAIC(lm_full_H_C, direction="backward", trace=0)
```

```
##
## Call:
## lm(formula = shannon ~ read_count.scaled + cycle_phase + social_grp_size.scaled,
##      data = meta_C)
##
## Coefficients:
##              (Intercept)      read_count.scaled      cycle_phases
##              4.3547            0.5835            -1.0160
##              cycle_phase0      cycle_phaseD  social_grp_size.scaled
##              -0.7118            -1.2716            -0.2943
```

```
# Final model for Shannon's diversity index
summary(lm(shannon ~ (read_count.scaled + cycle_phase + social_grp_size.scaled), data=meta_C))
```

```
##
## Call:
## lm(formula = shannon ~ (read_count.scaled + cycle_phase + social_grp_size.sc
aled),
##     data = meta_C)
##
## Residuals:
##     Min       1Q   Median       3Q      Max
## -1.2726 -0.2955  0.0912  0.2415  0.7878
##
## Coefficients:
##              Estimate Std. Error t value Pr(>|t|)
## (Intercept)      4.3547    0.1866  23.333 < 2e-16 ***
## read_count.scaled  0.5835    0.1116   5.230 3.03e-05 ***
## cycle_phases     -1.0160    0.3003  -3.383 0.002678 **
## cycle_phaseO     -0.7118    0.3219  -2.212 0.037691 *
## cycle_phaseD     -1.2716    0.2982  -4.264 0.000317 ***
## social_grp_size.scaled -0.2943    0.1049  -2.806 0.010294 *
## ---
## Signif. codes:  0 '***' 0.001 '**' 0.01 '*' 0.05 '.' 0.1 ' ' 1
##
## Residual standard error: 0.5116 on 22 degrees of freedom
## Multiple R-squared:  0.6255, Adjusted R-squared:  0.5403
## F-statistic: 7.348 on 5 and 22 DF,  p-value: 0.0003492
```

### FIGURE 3:

```
library(graphics) #version 3.2.2
# Panel A
meta_noMC$rep_state <- factor(meta_noMC$rep_state, c("C","P","PPA"))
meta_C$cycle_phase <- factor(meta_C$cycle_phase, c("A","S","O","D"))
bxpl_R <- boxplot(meta_noMC$shannon ~ meta_noMC$rep_state)
```

```
bxpl_C <- boxplot(meta_C$shannon ~ meta_C$cycle_phase)
```

```

bxp(bxpl_R, ylab="Shannon's Diversity Index", ylim=c(2,8), xlim=c(0.5,8.5), box
wex=0.5, cex.axis=1.25, cex.lab=1.5, boxfill= c("darkturquoise", "darkorange",
"purple"), at=c(1,2,3))
bxp(bxpl_C, ylab="", ylim=c(2,8), xlim=c(0.5,8.5), boxwex=0.5, cex.axis=1.25, c
ex.lab=1.5, boxfill= c("red", "gold3", "#33A02C", "blue"), at=c(5,6,7,8), add=T
RUE)
abline(v=4, lty=2, lwd=2)
segments(1,7.9,2,7.9, col="black",lwd=2.5) #C vs. P
text(x=1.5,y=8.05,labels="*",cex=2) #C vs. P
segments(1,7.45,3,7.45, col="black",lwd=2.5) #C vs. PPA
text(x=2,y=7.6,labels="***",cex=2) #C vs. PPA
segments(2,7,3,7, col="black",lwd=2.5) #P vs. PPA
text(x=2.5,y=7.15,labels="***",cex=2) #P vs. PPA
segments(5,5.4,6,5.4, col="black",lwd=2.5) #A vs. S
text(x=5.5,y=5.55,labels="**",cex=2) #A vs. S
segments(5,5.85,7,5.85, col="black",lwd=2.5) #A vs. O
text(x=6,y=6,labels="*",cex=2) #A vs. O
segments(5,6.3,8,6.3, col="black",lwd=2.5) #A vs. D
text(x=6.5,y=6.45,labels="***",cex=2) #A vs. D
mtext("A", side=3, at=c(-1), line=0, cex=2, font=2)

```

**A**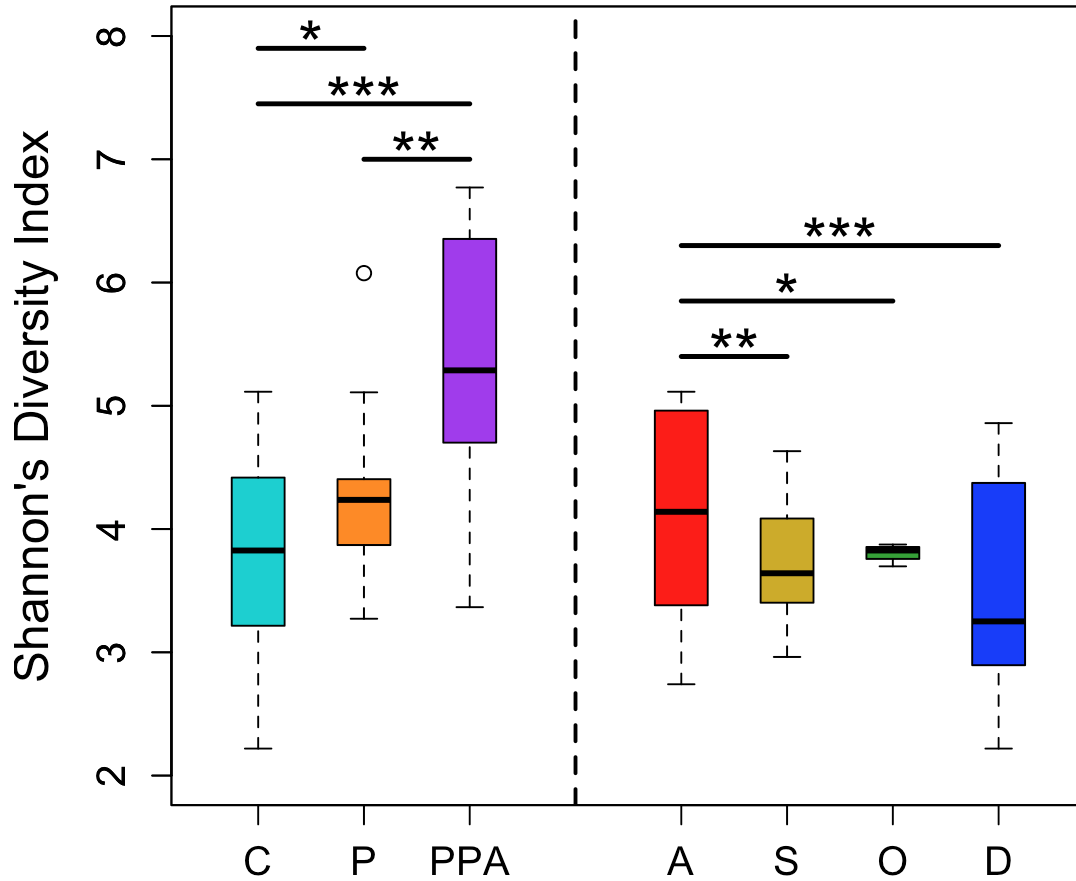*# Panel B*

```

plot(meta_C$richness ~ meta_C$cycle_phase, pch=20, xlab=NA, ylab="OTU Richness"
, ylim=c(0,7000), boxwex=0.5, cex.axis=1.25, cex.lab=1.5, col= c("red", "gold3"
, "#33A02C", "blue"))
segments(1,6850,4,6850, col="black",lwd=2.5) #A vs. D
text(x=2.5,y=7000,labels="*",cex=2) #A vs. D
segments(3,5750,4,5750, col="black",lwd=2.5) #O vs. D
text(x=3.5,y=5900,labels="*",cex=2) #O vs. D
segments(1,6514,2,6514, col="black",lwd=2.5) #A vs. S
text(x=1.5,y=6664,labels="*",cex=2) #A vs. S
segments(2,6086,3,6086, col="black",lwd=2.5) #S vs. O
text(x=2.5,y=6236,labels="*",cex=2) #S vs. O
mtext("B", side=3, at=c(-0.25), line=0, cex=2, font=2)

```



**B**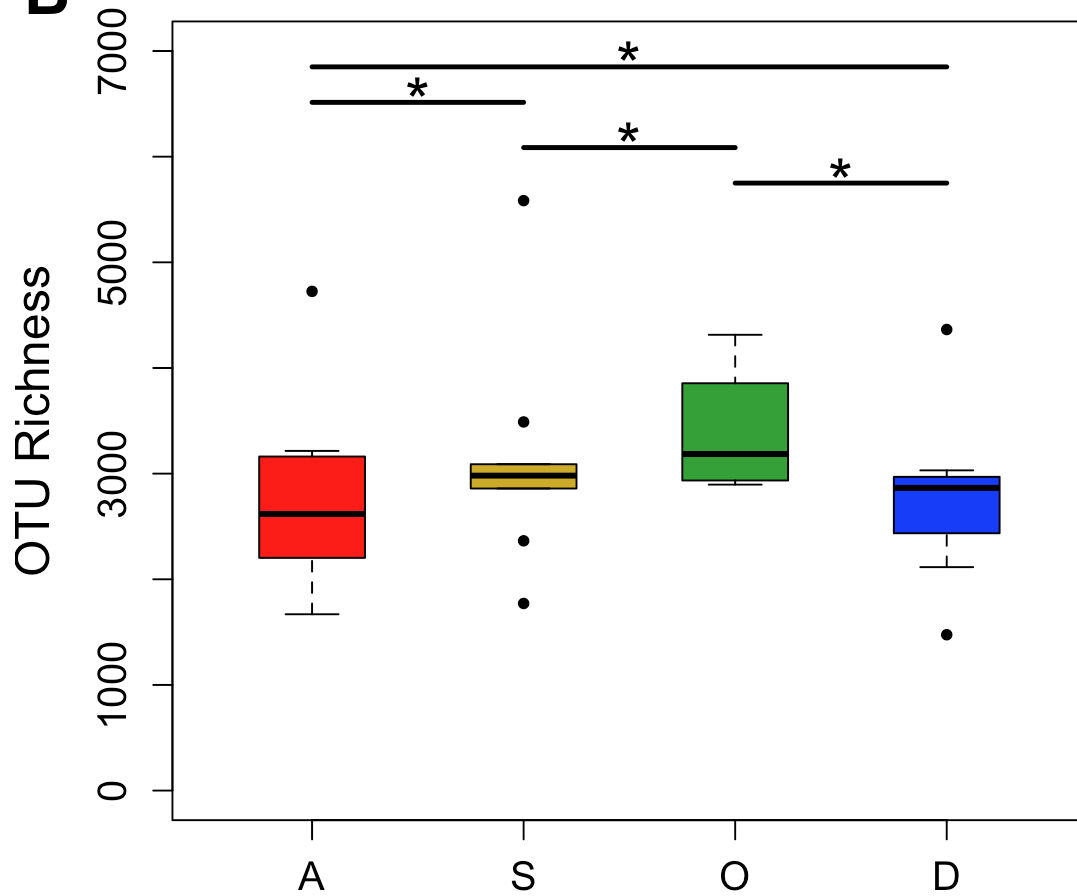

```
# Panel C
```

```
plot(meta_noMC$shannon ~ meta_noMC$social_grp_size, pch=20, xlab="Social Group  
Size", ylab="Shannon's Diversity Index", cex.axis=1.25, cex.lab=1.5, xlim=c(20,  
120), ylim=c(2,7))
```

```
abline(lm(meta_noMC$shannon ~ meta_noMC$social_grp_size), col="black")
```

```
mtext("C", side=3, at=c(0), line=0, cex=2, font=2)
```

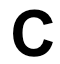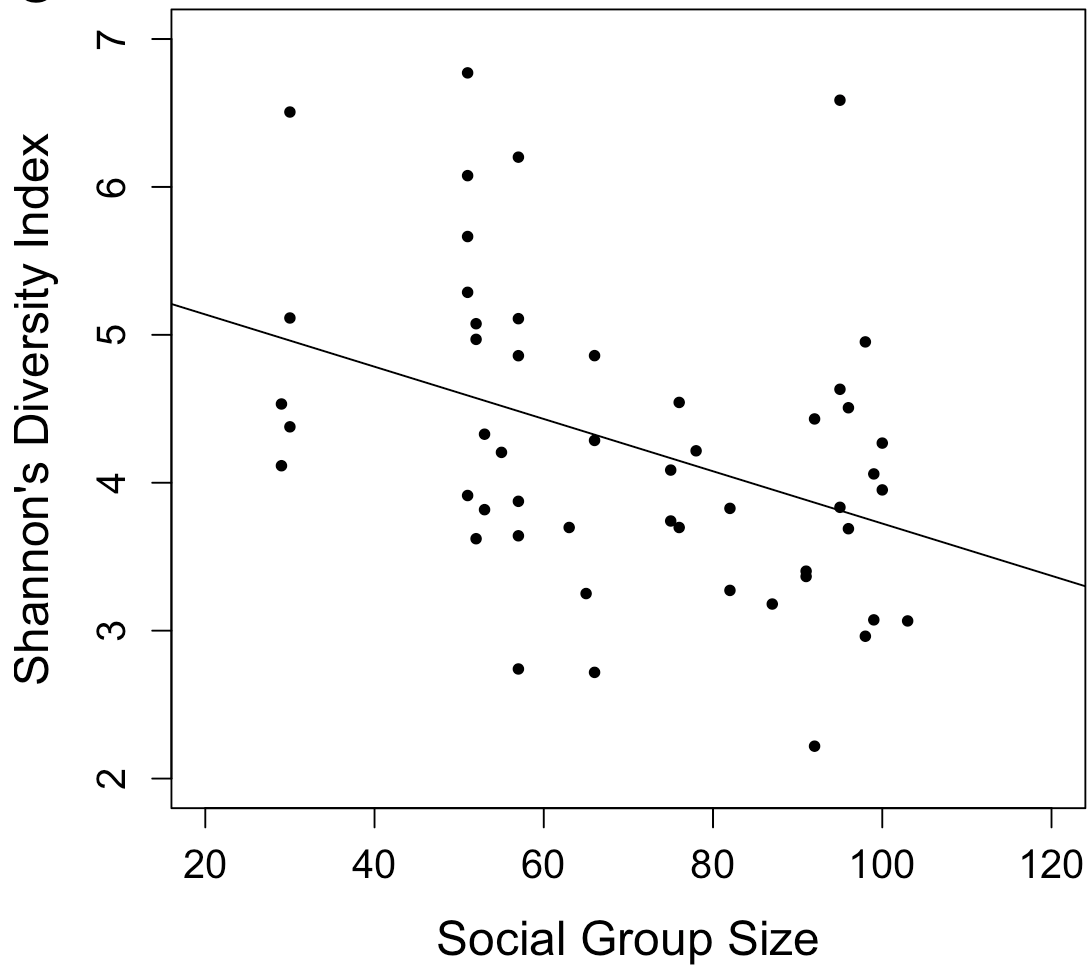

```
# Panel D  
plot(meta_noMC$richness ~ meta_noMC$rainfall, pch=20, xlab="Rainfall in Past 30  
Days", ylab="OTU Richness", names=c("No Rainfall", "Rainfall"), ylim=c(0,7000)  
, boxwex=0.5, cex.axis=1.25, cex.lab=1.5, col=c("burlywood4", "darkgreen"))  
segments(1,6250,2,6250, col="black",lwd=2.5)  
text(x=1.5,y=6500,labels="*",cex=2)  
mtext("D", side=3, at=c(0.1), line=0, cex=2, font=2)
```

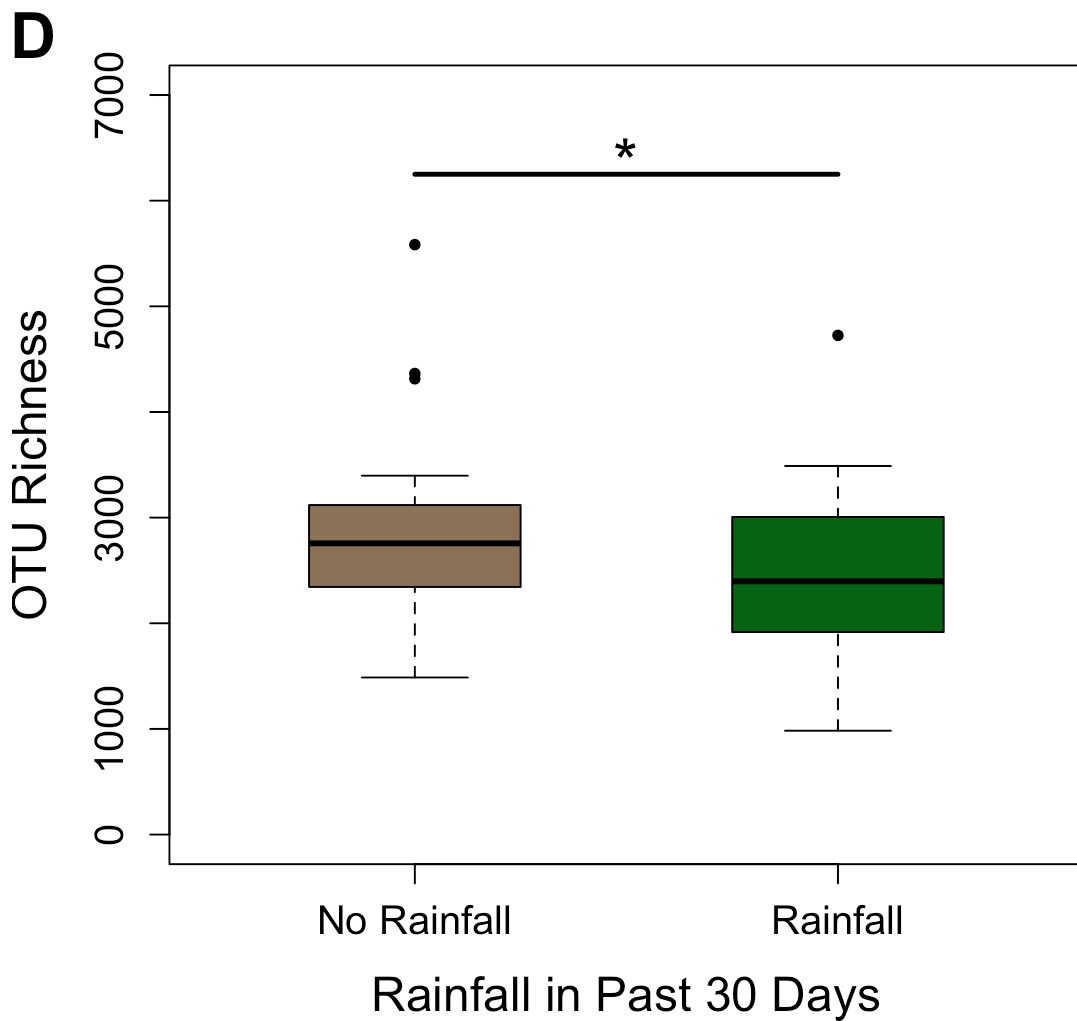

**FIGURE S4:**

```
meta_P <- droplevels(subset(meta_noMC, rep_state == "P"))
# Control for read count
plot(meta_P$preg_day, lm(shannon ~ read_count, data=meta_P)$residuals, xlab="Days into Pregnancy", ylab="Shannon's Diversity Index (residuals)", pch=19, xlim=c(0,100), cex.lab=1.5, cex.axis=1.5)
abline(lm(lm(shannon ~ read_count, data=meta_P)$residuals ~ preg_day, data=meta_P), col="black")
```

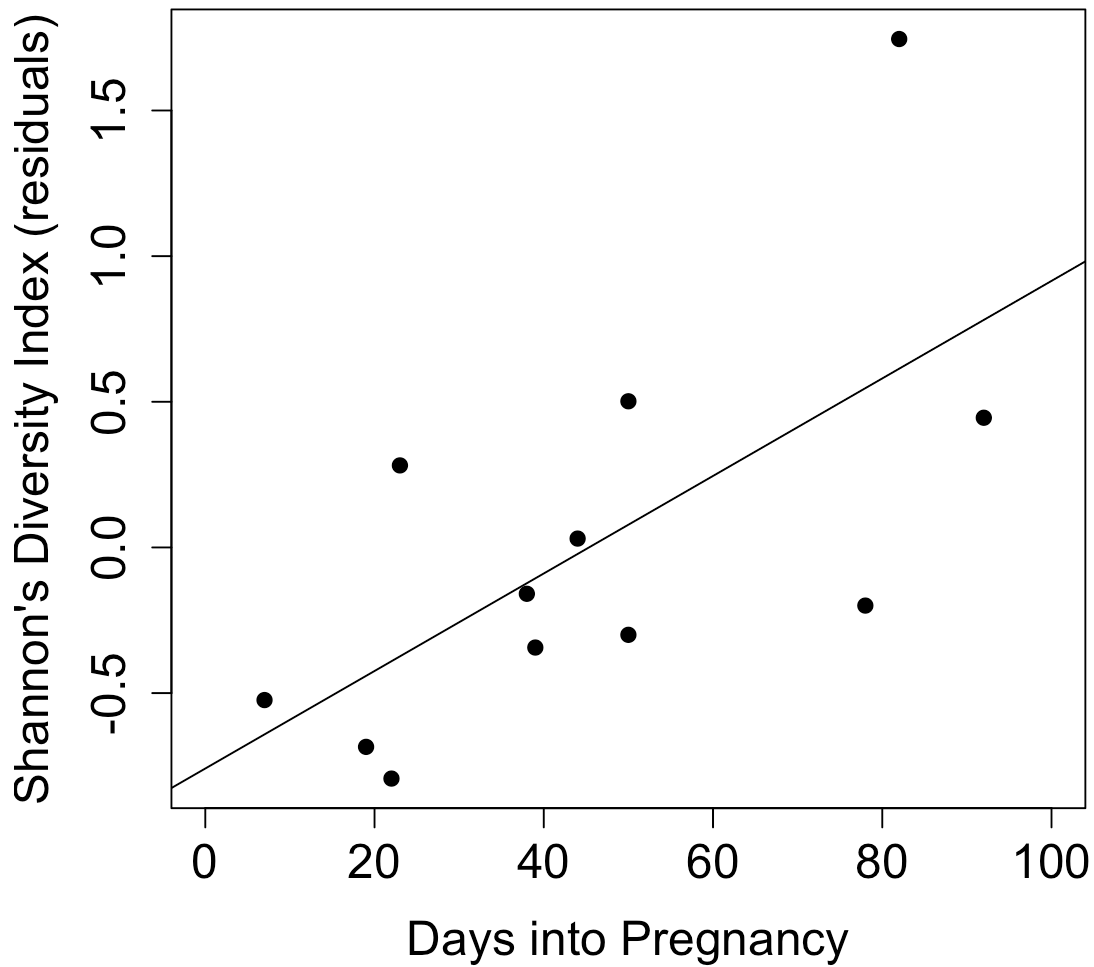

**Do females in larger social groups experience more consortships and consortship partners per ovarian cycle than females in smaller groups?**

We used behavioral data on all mature females present within the Amboseli Baboon Research Project study population between 2007 and 2010. For each ovarian cycle of each female (i.e. beginning of the swelling phase to the end of the deturgescence phase), we calculated the number of observed consortships and the number of distinct consortship partners.

*# The number of observations can depend on the number of observers concurrently watching a group and the number of times a group was visited. Thus, we controlled for differences in observation intensity by using a proxy of a group's true observer effort: the number of focal animal samples that occurred in the group during a female's ovarian cycle divided by the average group size during the same time period.*

```
library(lme4) #version 1.1-12
all_consort$"obs_effort" <- all_consort$focal_samples/all_consort$avg_grp_size
# Scale all factors
all_consort$"obs_effort.scaled" <- scale(all_consort$obs_effort)
all_consort$"avg_grp_size.scaled" <- scale(all_consort$avg_grp_size)
all_consort$"consorter_count.scaled" <- scale(all_consort$consorter_count)
all_consort$"consort_count.scaled" <- scale(all_consort$consort_count)
# Relationship between number of consortships and social group size
summary(glmmer(consort_count ~ (avg_grp_size.scaled + obs_effort.scaled) + (1|ba
boon_id), family="poisson", data=all_consort))
```

```

## Generalized linear mixed model fit by maximum likelihood (Laplace
## Approximation) [glmerMod]
## Family: poisson ( log )
## Formula: consort_count ~ (avg_grp_size.scaled + obs_effort.scaled) + (1 |
## baboon_id)
## Data: all_consort
##
##      AIC      BIC   logLik deviance df.resid
## 4335.1  4354.4 -2163.6  4327.1     909
##
## Scaled residuals:
##      Min       1Q   Median       3Q      Max
## -3.0028 -0.9788 -0.2694  0.7178  7.2603
##
## Random effects:
## Groups      Name                Variance Std.Dev.
## baboon_id (Intercept) 0.4489    0.67
## Number of obs: 913, groups: baboon_id, 117
##
## Fixed effects:
##              Estimate Std. Error z value Pr(>|z|)
## (Intercept)      0.94619   0.06850   13.81  <2e-16 ***
## avg_grp_size.scaled 0.51308   0.05046   10.17  <2e-16 ***
## obs_effort.scaled  0.31730   0.02170   14.62  <2e-16 ***
## ---
## Signif. codes:  0 '***' 0.001 '**' 0.01 '*' 0.05 '.' 0.1 ' ' 1
##
## Correlation of Fixed Effects:
##              (Intr) avg__
## avg_grp_sz. -0.122
## obs_ffrt.sc -0.051  0.330

```

```

# Relationship between number of unique consortship partners and social group s
ize
summary(glmer(consorter_count ~ (avg_grp_size.scaled + obs_effort.scaled) + (1|
baboon_id), family="poisson", data=all_consort))

```

```

## Generalized linear mixed model fit by maximum likelihood (Laplace
## Approximation) [glmerMod]
## Family: poisson ( log )
## Formula: consorter_count ~ (avg_grp_size.scaled + obs_effort.scaled) +
## (1 | baboon_id)
## Data: all_consort
##
##      AIC      BIC   logLik deviance df.resid
## 2844.9  2864.2 -1418.5  2836.9     909
##
## Scaled residuals:
##      Min       1Q   Median       3Q      Max
## -1.6158 -0.7372 -0.1344  0.5503  3.8244
##
## Random effects:
## Groups   Name                Variance Std.Dev.
## baboon_id (Intercept) 0.1688    0.4109
## Number of obs: 913, groups: baboon_id, 117
##
## Fixed effects:
##              Estimate Std. Error z value Pr(>|z|)
## (Intercept)      0.42246   0.04981   8.482 < 2e-16 ***
## avg_grp_size.scaled 0.27899   0.05105   5.465 4.62e-08 ***
## obs_effort.scaled  0.16616   0.03474   4.783 1.72e-06 ***
## ---
## Signif. codes:  0 '***' 0.001 '**' 0.01 '*' 0.05 '.' 0.1 ' ' 1
##
## Correlation of Fixed Effects:
##              (Intr) avg__
## avg_grp_sz. -0.122
## obs_ffrt.sc -0.060  0.499

```

**FIGURE S5**

```

par(mfrow=c(1,2))
# Control for observer effort and baboon_id
glmer_consort_residuals <- residuals(glmer(consort_count ~ (obs_effort.scaled)
+ (1|baboon_id), family="poisson", data=all_consort))
glmer_consorter_residuals <- residuals(glmer(consorter_count ~ (obs_effort.scaled)
+ (1|baboon_id), family="poisson", data=all_consort))
# Panel A
plot(glmer_consort_residuals ~ all_consort$avg_grp_size, xlab="Social group size",
ylab="No. of consortships (residuals)", pch=19, cex.lab=1.25, cex.axis=1.25,
xlim=c(20,120))
abline(lm(glmer_consort_residuals ~ all_consort$avg_grp_size),col="black")
mtext("A", side=3, at=c(-2), line=0.5, cex=2, font=2)
# Panel B
plot(glmer_consorter_residuals ~ all_consort$avg_grp_size, xlab="Social group size",
ylab="No. of unique consortship partners (residuals)", pch=19, cex.lab=1.25,
cex.axis=1.25, xlim=c(20,120), ylim=c(-3,3))
abline(lm(glmer_consorter_residuals ~ all_consort$avg_grp_size),col="black")
mtext("B", side=3, at=c(-2), line=0.5, cex=2, font=2)

```

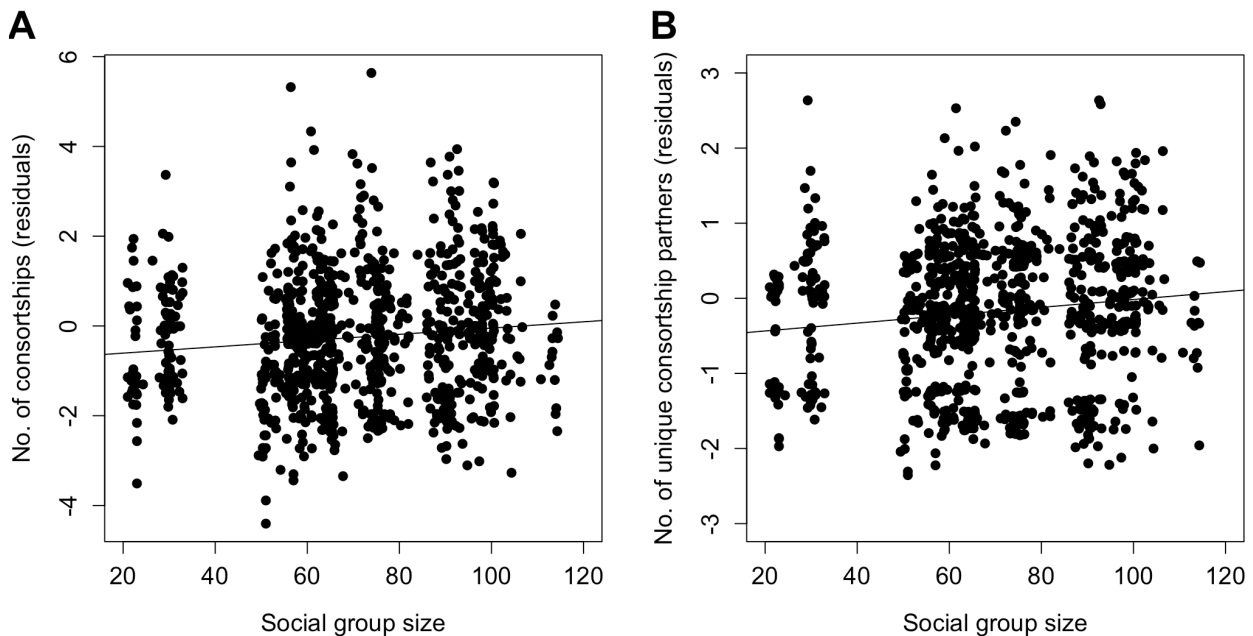

```

par(mfrow=c(1,1))

```

## Beta diversity

Should we account for baboon ID in beta diversity analyses?

Four baboons were sampled twice.



```

library(cluster) #version 2.0.4
library(reshape) #version 0.8.5
# Are samples from the same baboon more similar?
# Dataframe of all possible sample dyads:
all_dyads <- data.frame(t(combn(row.names(sid),2)), as.factor(as.numeric(bid_gower)))
names(all_dyads) <- c("sample_id1", "sample_id2", "same_baboon")
r <- melt(as.matrix(daisy(data.frame(rep=metal$rep_cycle, row.names=row.names(metal)), metric="gower")))
colnames(r) <- c("sample_id1", "sample_id2", "same_rep")
# Dissimilarity matrices
bray_melt <- melt(data.matrix(bray))
colnames(bray_melt) <- c("sample_id1", "sample_id2", "bray")
unifrac_melt <- melt(data.matrix(unifrac))
colnames(unifrac_melt) <- c("sample_id1", "sample_id2", "unifrac")
all_dyads1 <- join_all(list(all_dyads, bray_melt, unifrac_melt, r), by=c("sample_id1","sample_id2"))
# Control for reproductive state and cycle phase
bray_residuals <- residuals(lm(all_dyads1$bray ~ all_dyads1$same_rep))
unifrac_residuals <- residuals(lm(all_dyads1$unifrac ~ all_dyads1$same_rep))
all_dyads2 <- cbind(all_dyads1, bray_residuals, unifrac_residuals)
# Because sample sizes are not equal, use Wilcoxon rank-sum tests (Mann-Whitney U tests)
# Bray-Curtis dissimilarity
wilcox.test(all_dyads2$bray_residuals ~ all_dyads2$same_baboon)

```

```

##
## Wilcoxon rank sum test with continuity correction
##
## data: all_dyads2$bray_residuals by all_dyads2$same_baboon
## W = 1717, p-value = 0.2257
## alternative hypothesis: true location shift is not equal to 0

```

```

# Weighted UniFrac distance
wilcox.test(all_dyads2$unifrac_residuals ~ all_dyads2$same_baboon)

```

```

##
## Wilcoxon rank sum test with continuity correction
##
## data: all_dyads2$unifrac_residuals by all_dyads2$same_baboon
## W = 1993, p-value = 0.395
## alternative hypothesis: true location shift is not equal to 0

```

Based on Wilcoxon rank sum tests (Mann-Whitney U tests), samples from the same baboon are no

more similar to each other than samples from different baboons.

**FIGURE S3**

```

library(labdsv) #version 1.8-0
library(vegan) #version 2.4-1
# Panel A
bray.pcoa <- pco(as.matrix(bray), k=3)
bray.var_pco1 <- (bray.pcoa$eig[1]/sum(bray.pcoa$eig))*100
bray.var_pco2 <- (bray.pcoa$eig[2]/sum(bray.pcoa$eig))*100
bray.points <- data.frame(bray.pco1=bray.pcoa$points[,1], bray.pco2=bray.pcoa$points[,2])
meta2 <- merge(meta1, bray.points, by="row.names")
rownames(meta2) <- meta2$Row.names
meta2$Row.names <- NULL
layout(matrix(c(1,2,3,4), 2, 2, byrow = TRUE), widths=c(2, 1.5))
xpd=NA
plot(meta2$bray.pco1, meta2$bray.pco2,xlab=paste("PCO 1 (",signif(bray.var_pco1,2),"%)",sep=""),ylab=paste("PCO 2 (",signif(bray.var_pco2,2),"%)",sep=""), pch=ifelse(meta2$baboon_id=="B1", 19, ifelse(meta2$baboon_id=="B2",19, ifelse(meta2$baboon_id=="B3", 19, ifelse(meta2$baboon_id=="B4", 19, 1)))), col=ifelse(meta2$baboon_id=="B1", "red", ifelse(meta2$baboon_id=="B2","blue", ifelse(meta2$baboon_id=="B3", "#33A02C", ifelse(meta2$baboon_id=="B4", "orange", "black")))), xlim=c(-0.6,0.6), ylim=c(-0.4,0.4), cex.lab=1.5, cex.axis=1.5, cex=2)
text("A", x=-0.59, y=0.39, cex=2, font=2)
# Panel B
boxplot(all_dyads2$bray_residuals ~ all_dyads2$same_baboon, ylim=c(-0.6,0.6), cex.axis=1.5, cex.lab=1.5, ylab="Microbiota Bray-Curtis dissimilarity (residuals)", boxwex=0.5, pch=3, xaxt="n")
axis(1, at=c(1,2), labels=c("Same\nIndividual", "Different\nIndividuals"), cex.axis=1.5, cex.lab=1.5, mgp=c(3,0.5,0), padj=1)
text("B", x=0.55, y=0.58, cex=2, font=2)
# Panel C
unifrac.pcoa <- pco(as.matrix(unifrac), k=3)
unifrac.var_pco1 <- (unifrac.pcoa$eig[1]/sum(unifrac.pcoa$eig))*100
unifrac.var_pco2 <- (unifrac.pcoa$eig[2]/sum(unifrac.pcoa$eig))*100
unifrac.points <- data.frame(unifrac.pco1=unifrac.pcoa$points[,1], unifrac.pco2=unifrac.pcoa$points[,2])
meta3 <- merge(meta2, unifrac.points, by="row.names")
rownames(meta3) <- meta3$Row.names
meta3$Row.names <- NULL
plot(meta3$unifrac.pco1, meta3$unifrac.pco2,xlab=paste("PCO 1 (",signif(unifrac.var_pco1,2),"%)",sep=""),ylab=paste("PCO 2 (",signif(unifrac.var_pco2,2),"%)",sep=""), pch=ifelse(meta3$baboon_id=="B1", 19, ifelse(meta3$baboon_id=="B2",19, ifelse(meta3$baboon_id=="B3", 19, ifelse(meta3$baboon_id=="B4", 19, 1)))), col=ifelse(meta3$baboon_id=="B1", "red", ifelse(meta3$baboon_id=="B2","blue", ifelse(meta3$baboon_id=="B3", "#33A02C", ifelse(meta3$baboon_id=="B4", "orange", "black")))), xlim=c(-0.6,0.6), ylim=c(-0.4,0.4), cex.lab=1.5, cex.axis=1.5, cex=2)
text("C", x=-0.59, y=0.39, cex=2, font=2)

```

```
# Panel D
boxplot(all_dyads2$unifrac_residuals ~ all_dyads2$same_baboon, ylim=c(-0.6,0.6)
, cex.axis=1.5, cex.lab=1.5, ylab="Microbiota weighted UniFrac (residuals)", bo
xwex=0.5, pch=3, xaxt="n")
axis(1, at=c(1,2), labels=c("Same\nIndividual", "Different\nIndividuals"), cex.
axis=1.5, cex.lab=1.5, mgp=c(3,0.5,0), padj=1)
text("D", x=0.55, y=0.58, cex=2, font=2)
```

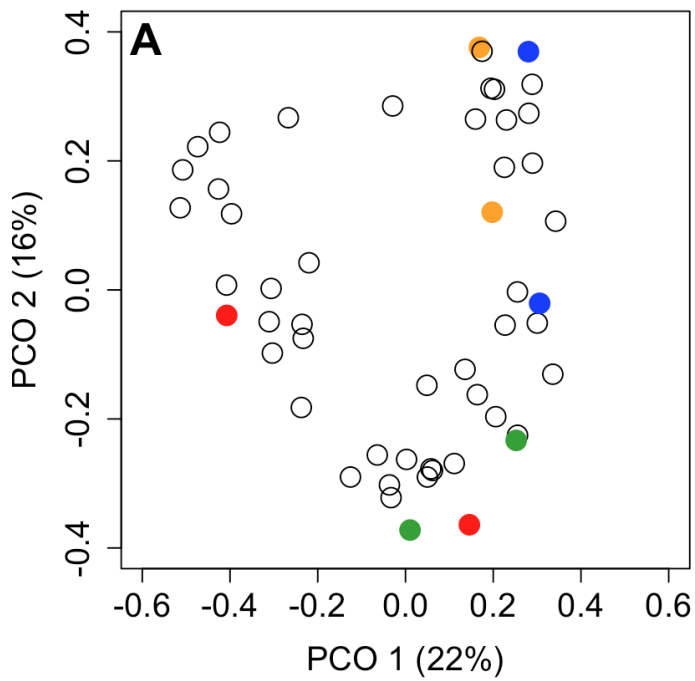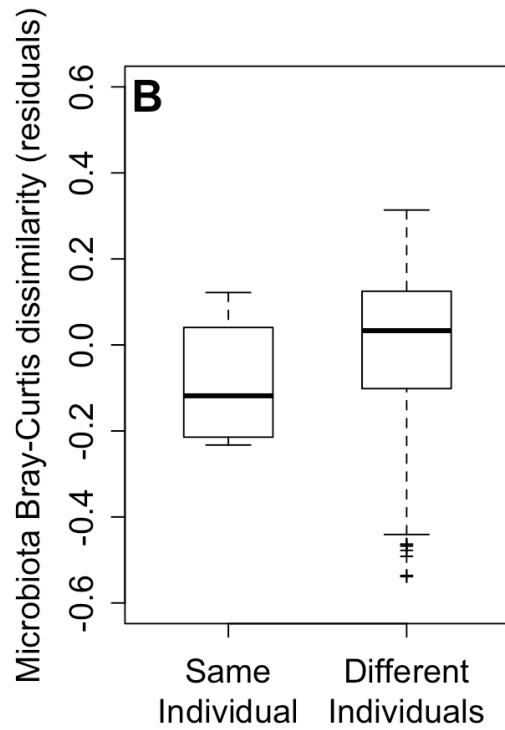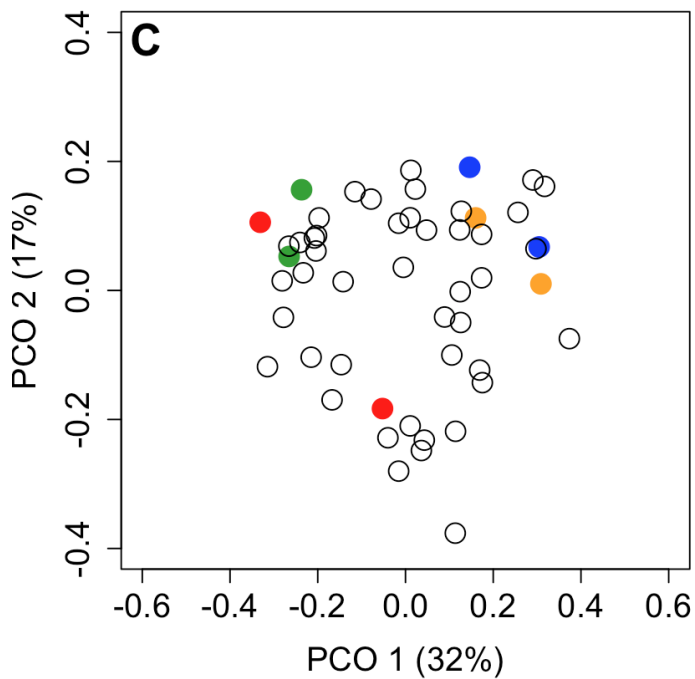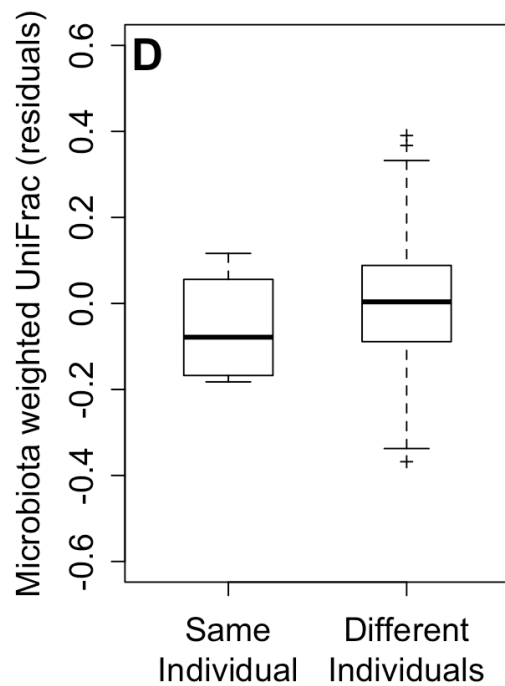

### What host factors predict beta diversity?

We performed PERMANOVAs using Bray-Curtis dissimilarity and weighted UniFrac distance to identify predictors of vaginal microbial dissimilarity between samples.

Note: Due to the random iterative nature of this analysis, Pr(>F) may vary slightly with reanalyses.

```
library(vegan) #version 2.4-1
bray_noMC <- bray[rownames(bray) %in% rownames(meta_noMC), colnames(bray) %in%
rownames(meta_noMC)]
unifrac_noMC <- unifrac[rownames(unifrac) %in% rownames(meta_noMC), colnames(un
ifrac) %in% rownames(meta_noMC)]
# Make sure dissimilarity matrices and metadata dataframe are in the same order
bray_noMC_ordered <- bray_noMC[match(rownames(meta_noMC), rownames(bray_noMC)),
match(rownames(meta_noMC), colnames(bray_noMC))]
unifrac_noMC_ordered <- unifrac_noMC[match(rownames(meta_noMC), rownames(unifra
c_noMC)), match(rownames(meta_noMC), colnames(unifrac_noMC))]
# PERMANOVAs: reproductive state
adonis(bray_noMC_ordered ~ meta_noMC$rep_state, permutations=10000, method="bra
y")$aov.tab
```

```
## Permutation: free
## Number of permutations: 10000
##
## Terms added sequentially (first to last)
##
##              Df SumsOfSqs MeanSqs F.Model      R2      Pr(>F)
## meta_noMC$rep_state  2      2.8878 1.44388  5.2415 0.17925 9.999e-05 ***
## Residuals           48     13.2225 0.27547          0.82075
## Total                50     16.1103          1.00000
## ---
## Signif. codes:  0 '***' 0.001 '**' 0.01 '*' 0.05 '.' 0.1 ' ' 1
```

```
adonis(unifrac_noMC_ordered ~ meta_noMC$rep_state, permutations=10000)$aov.tab
```

```
## Permutation: free
## Number of permutations: 10000
##
## Terms added sequentially (first to last)
##
##              Df SumsOfSqs MeanSqs F.Model      R2      Pr(>F)
## meta_noMC$rep_state  2      1.1493 0.57464  5.8078 0.19484 9.999e-05 ***
## Residuals           48      4.7493 0.09894          0.80516
## Total                50      5.8985          1.00000
## ---
## Signif. codes:  0 '***' 0.001 '**' 0.01 '*' 0.05 '.' 0.1 ' ' 1
```

```
# Repeat PERMANOVAs on just cycling females (n=28)
bray_C <- bray[rownames(bray) %in% rownames(meta_C), colnames(bray) %in% rownames(meta_C)]
unifrac_C <- unifrac[rownames(unifrac) %in% rownames(meta_C), colnames(unifrac) %in% rownames(meta_C)]
bray_C_ordered <- bray_C[match(rownames(meta_C), rownames(bray_C)), match(rownames(meta_C), colnames(bray_C))]
unifrac_C_ordered <- unifrac_C[match(rownames(meta_C), rownames(unifrac_C)), match(rownames(meta_C), colnames(unifrac_C))]
adonis(dist(bray_C_ordered) ~ meta_C$cycle_phase, permutations=10000, method="bray")$aov.tab
```

```
## Permutation: free
## Number of permutations: 10000
##
## Terms added sequentially (first to last)
##
##              Df SumsOfSqs MeanSqs F.Model      R2    Pr(>F)
## meta_C$cycle_phase  3    12.489  4.1629  5.0873 0.38872 9.999e-05 ***
## Residuals          24    19.639  0.8183           0.61128
## Total              27    32.127           1.00000
## ---
## Signif. codes:  0 '***' 0.001 '**' 0.01 '*' 0.05 '.' 0.1 ' ' 1
```

```
adonis(unifrac_C_ordered ~ meta_C$cycle_phase, permutations=10000)$aov.tab
```

```
## Permutation: free
## Number of permutations: 10000
##
## Terms added sequentially (first to last)
##
##              Df SumsOfSqs MeanSqs F.Model      R2 Pr(>F)
## meta_C$cycle_phase  3    0.65761 0.219204  2.3053 0.2237 0.0033 **
## Residuals          24    2.28208 0.095087           0.7763
## Total              27    2.93969           1.0000
## ---
## Signif. codes:  0 '***' 0.001 '**' 0.01 '*' 0.05 '.' 0.1 ' ' 1
```

**FIGURE 4A**

```

meta3$rep_state <- factor(meta3$rep_state, levels = c("C", "P", "PPA", "MC"))
par(fig=c(0,0.8,0,0.8), new=TRUE, xpd=TRUE, mar=c(10, 4, 1, 4))
plot(meta3$bray.pco1, meta3$bray.pco2, xlab=paste("PCO 1 (",signif(bray.var_pco
1,2),"%)",sep=""), ylab=paste("PCO 2 (",signif(bray.var_pco2,2),"%)",sep=""), p
ch=19, col= c("darkturquoise", "darkorange", "purple", "navy")[as.numeric(meta3
$rep_state)], xlim=c(-0.6,0.6), ylim=c(-0.5,0.5), cex.lab=1.25, cex.axis=1.25)
legend('bottom', inset=c(1,-0.55), c("Ovarian Cycling","Pregnant","Postpartum A
menorrhea","Miscarrying"), col=c("darkturquoise","darkorange","purple","navy"),
pch=19, cex=1, xpd=TRUE)
mtext("A", side=3, at=c(-0.85), line=4, cex=2, font=2)
meta4_noMC <- droplevels(subset(meta3, meta3$rep_state != "MC"))
par(fig=c(0,0.8,0.49,0.95), new=TRUE, xpd=TRUE)
boxplot(meta4_noMC$bray.pco1 ~ meta4_noMC$rep_state, horizontal=TRUE, ylim=c(-0
.6,0.6), axes=FALSE, col=c("darkturquoise", "darkorange", "purple"), pch=21, ou
tbg=c("darkturquoise","darkorange","purple"))
par(fig=c(0.578,0.95,0,0.8),new=TRUE, xpd=TRUE)
boxplot(meta4_noMC$bray.pco2 ~ meta4_noMC$rep_state, ylim=c(-0.5,0.5), axes=FAL
SE, col=c("darkturquoise","darkorange","purple"), pch=21, outbg=c("darkturquois
e","darkorange", "purple"))

```



**A**

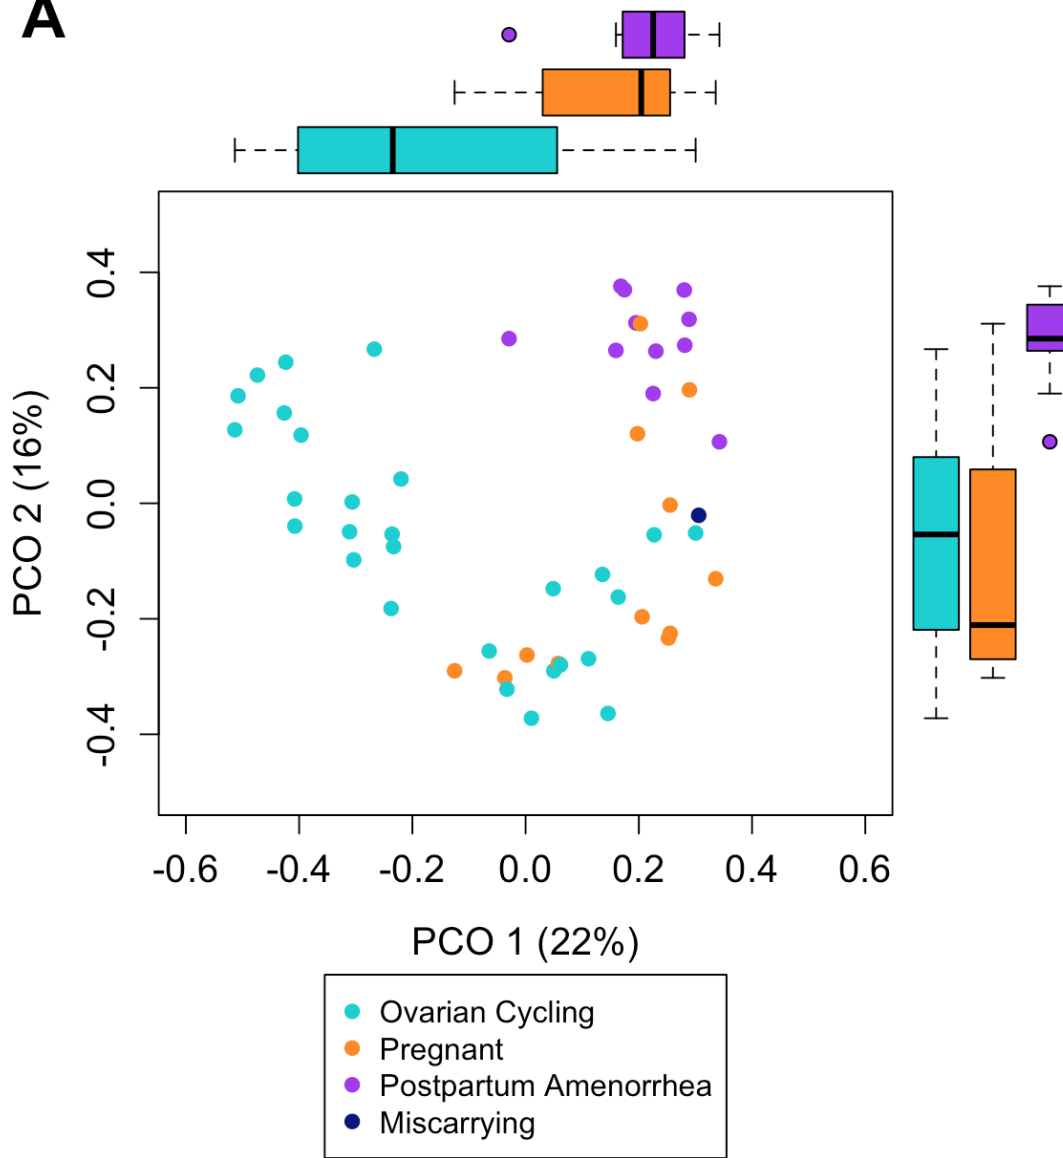

**FIGURE 4B**

```

bray_C.pcoa <- pco(as.matrix(bray_C), k=3)
bray_C.var_pco1 <- (bray_C.pcoa$eig[1]/sum(bray_C.pcoa$eig))*100
bray_C.var_pco2 <- (bray_C.pcoa$eig[2]/sum(bray_C.pcoa$eig))*100
bray_C.points <- data.frame(bray_C.pco1=bray_C.pcoa$points[,1], bray_C.pco2=bray_C.pcoa$points[,2])
meta_C1 <- merge(meta_C, bray_C.points, by="row.names")
rownames(meta_C1) <- meta_C1$Row.names
meta_C1$Row.names <- NULL
meta_C1$cycle_phase <- factor(meta_C1$cycle_phase, levels = c("A", "S", "O", "D"))
par(fig=c(0,0.8,0,0.8), new=TRUE, xpd=TRUE, mar=c(10, 4, 1, 4))
plot(meta_C1$bray_C.pco1, meta_C1$bray_C.pco2, xlab=paste("PCO 1 (",signif(bray_C.var_pco1,2),"%)",sep=""), ylab=paste("PCO 2 (",signif(bray_C.var_pco2,2),"%)",sep=""), pch=19, col= c("red", "gold3", "#33A02C", "blue")[as.numeric(meta_C1$cycle_phase)], xlim=c(-0.6,0.6), ylim=c(-0.5,0.5), cex.lab=1.25, cex.axis=1.25)
legend('bottom', inset=c(1,-0.55), c("Anestrus","Swelling","Peri-Ovulation","Deturgescence"), col=c("red", "gold3", "#33A02C", "blue"), pch=19, cex=1, xpd=TRUE)
mtext("B", side=3, at=c(-0.85), line=4, cex=2, font=2)
par(fig=c(0,0.8,0.49,0.95), new=TRUE, xpd=TRUE)
boxplot(meta_C1$bray_C.pco1 ~ meta_C1$cycle_phase, horizontal=TRUE, ylim=c(-0.6,0.6), axes=FALSE, col=c("red", "gold3", "#33A02C", "blue"), pch=21, outbg=c("red", "gold3", "#33A02C", "blue"))
par(fig=c(0.578,0.95,0,0.8),new=TRUE, xpd=TRUE)
boxplot(meta_C1$bray_C.pco2 ~ meta_C1$cycle_phase, ylim=c(-0.5,0.5), axes=FALSE, col=c("red", "gold3", "#33A02C", "blue"), pch=21, outbg=c("red", "gold3", "#33A02C", "blue"))

```

**B**

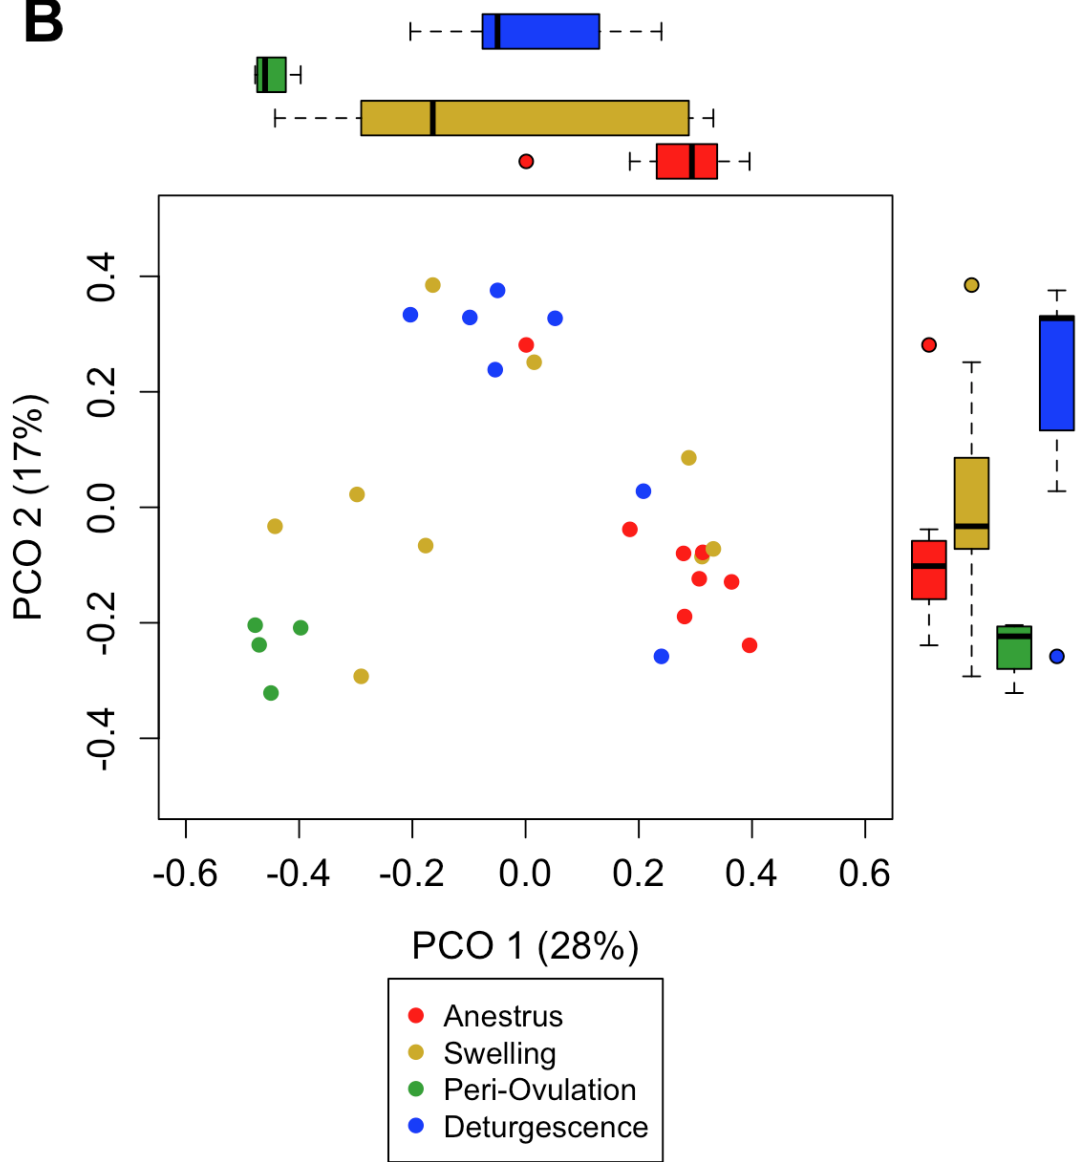

**FIGURE S6A**

```

par(fig=c(0,0.8,0,0.8), new=TRUE, xpd=TRUE, mar=c(10, 4, 1, 4))
plot(meta3$unifrac.pco1, meta3$unifrac.pco2, xlab=paste("PCO 1 (",signif(unifrac.var_pco1,2),"%)",sep=""), ylab=paste("PCO 2 (",signif(unifrac.var_pco2,2),"%)",sep=""), pch=19, col= c("darkturquoise", "darkorange", "purple", "navy")[as.numeric(meta3$rep_state)], xlim=c(-0.4,0.4), ylim=c(-0.4,0.4), cex.lab=1.25, cex.axis=1.25)
legend('bottom', inset=c(1,-0.55), c("Ovarian Cycling","Pregnant","Postpartum Amenorrhea","Miscarrying"), col=c("darkturquoise","darkorange","purple","navy"), pch=19, cex=1, xpd=TRUE)
mtext("A", side=3, at=c(-0.5), line=4, cex=2, font=2)
par(fig=c(0,0.8,0.49,0.95), new=TRUE, xpd=TRUE)
boxplot(meta4_noMC$unifrac.pco1 ~ meta4_noMC$rep_state, horizontal=TRUE, ylim=c(-0.4,0.4), axes=FALSE, col=c("darkturquoise", "darkorange", "purple"), pch=21, outbg=c("darkturquoise","darkorange","purple"))
par(fig=c(0.578,0.95,0,0.8),new=TRUE, xpd=TRUE)
boxplot(meta4_noMC$unifrac.pco2 ~ meta4_noMC$rep_state, ylim=c(-0.4,0.4), axes=FALSE, col=c("darkturquoise","darkorange","purple"), pch=21, outbg=c("darkturquoise","darkorange", "purple"))

```

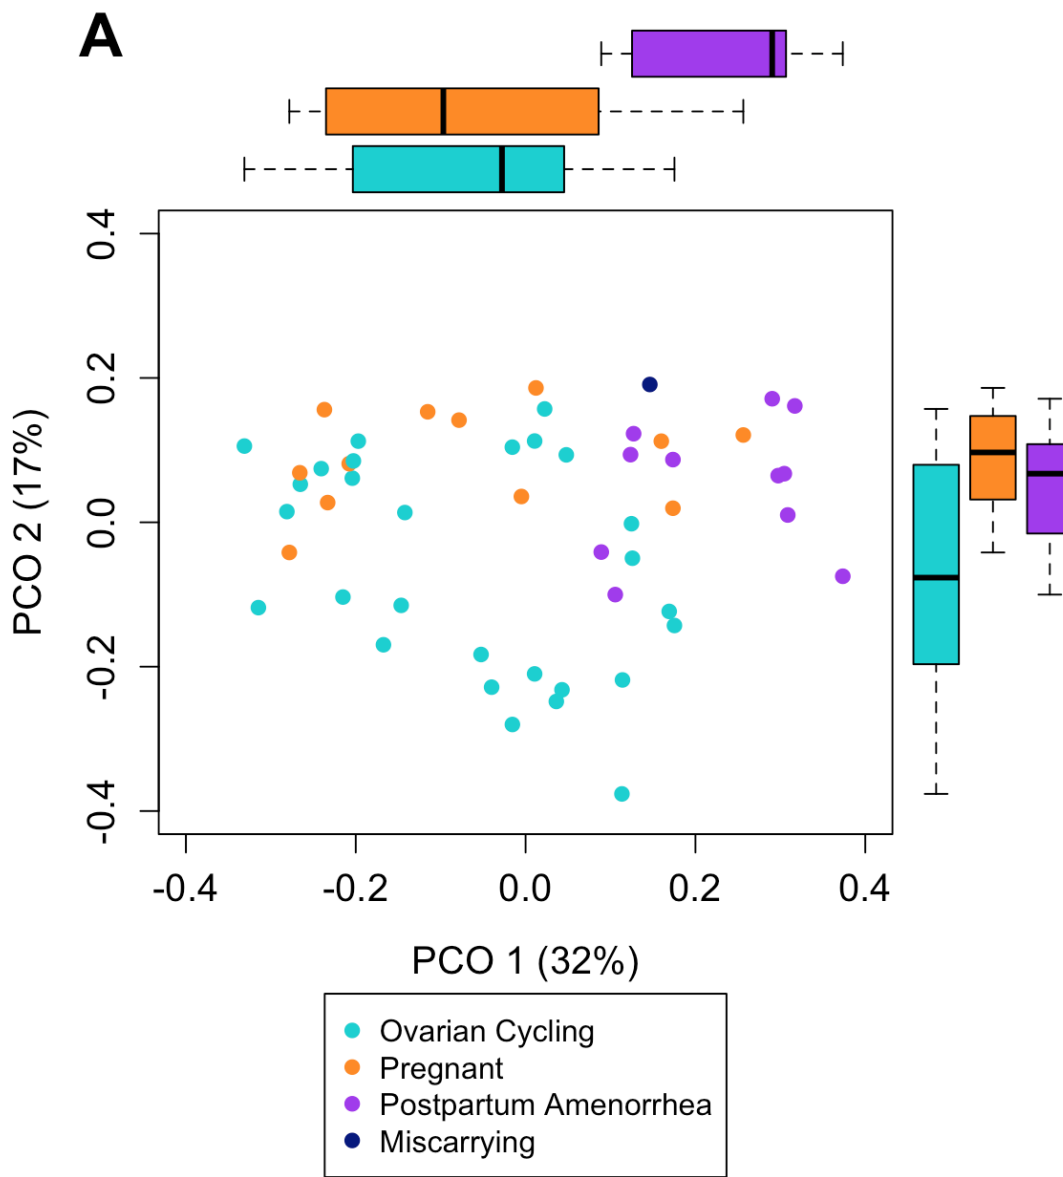

**FIGURE S6B**

```

unifrac_C.pcoa <- pco(as.matrix(unifrac_C), k=3)
unifrac_C.var_pco1 <- (unifrac_C.pcoa$eig[1]/sum(unifrac_C.pcoa$eig))*100
unifrac_C.var_pco2 <- (unifrac_C.pcoa$eig[2]/sum(unifrac_C.pcoa$eig))*100
unifrac_C.points <- data.frame(unifrac_C.pco1=unifrac_C.pcoa$points[,1], unifrac_C.pco2=unifrac_C.pcoa$points[,2])
meta_C1 <- merge(meta_C, unifrac_C.points, by="row.names")
rownames(meta_C1) <- meta_C1$Row.names
meta_C1$Row.names <- NULL
meta_C1$cycle_phase <- factor(meta_C1$cycle_phase, levels = c("A", "S", "O", "D"))
par(fig=c(0,0.8,0,0.8), new=TRUE, xpd=TRUE, mar=c(10, 4, 1, 4))
plot(meta_C1$unifrac_C.pco1, meta_C1$unifrac_C.pco2, xlab=paste("PCO 1 (",signif(unifrac_C.var_pco1,2),"%)",sep=""), ylab=paste("PCO 2 (",signif(unifrac_C.var_pco2,2),"%)",sep=""), pch=19, col= c("red", "gold3", "#33A02C", "blue")[as.numeric(meta_C1$cycle_phase)], xlim=c(-0.4,0.4), ylim=c(-0.4,0.4), cex.lab=1.25, cex.axis=1.25)
legend('bottom', inset=c(1,-0.55), c("Anestrus","Swelling","Peri-Ovulation","Deturgescence"), col=c("red", "gold3", "#33A02C", "blue"), pch=19, cex=1, xpd=TRUE)
mtext("B", side=3, at=c(-0.5), line=4, cex=2, font=2)
par(fig=c(0,0.8,0.49,0.95), new=TRUE, xpd=TRUE)
boxplot(meta_C1$unifrac_C.pco1 ~ meta_C1$cycle_phase, horizontal=TRUE, ylim=c(-0.4,0.4), axes=FALSE, col=c("red", "gold3", "#33A02C", "blue"), pch=21, outbg=c("red", "gold3", "#33A02C", "blue"))
par(fig=c(0.578,0.95,0,0.8),new=TRUE, xpd=TRUE)
boxplot(meta_C1$unifrac_C.pco2 ~ meta_C1$cycle_phase, ylim=c(-0.4,0.4), axes=FALSE, col=c("red", "gold3", "#33A02C", "blue"), pch=21, outbg=c("red", "gold3", "#33A02C", "blue"))

```

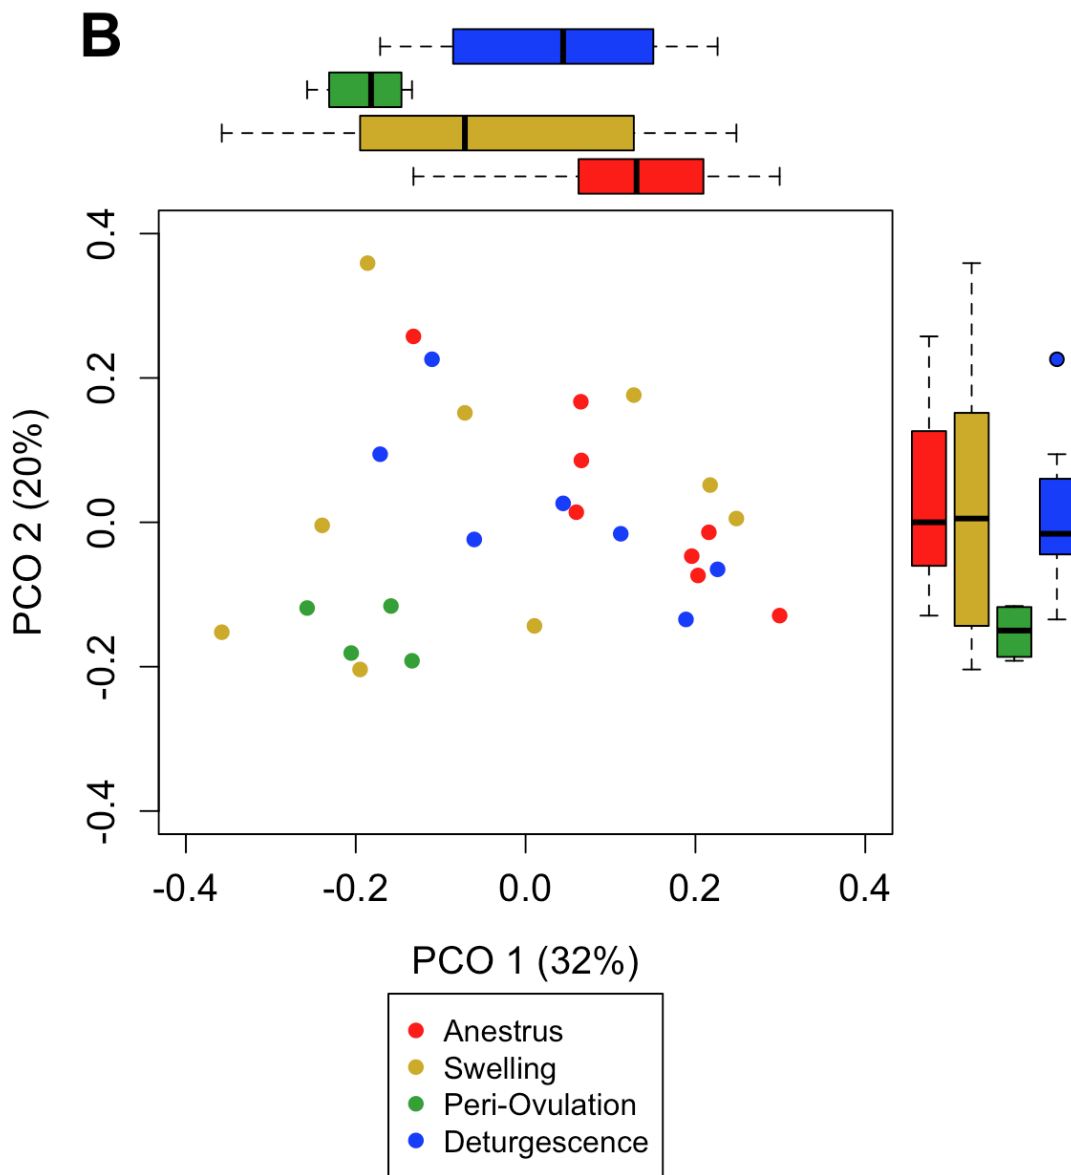

## LEfSe

### FIGURE 5A

The relationships between taxonomic levels were added to the figure in Microsoft PowerPoint. The significant LEfSe comparisons between reproductive states were also added in Microsoft PowerPoint.

```

# Combine all taxa relative abundance dataframes into a single dataframe
data <- rbind(phylum,class,order,family,genus,species)
# Remove unknown taxa
unknown_taxa <- grep("uncultured|Ambiguous_tax|Unknown",rownames(data), value=TRUE)
data1 <- subset(data, !(rownames(data) %in% unknown_taxa))
other_taxa <- grep("^.(Other)$",rownames(data1), value=TRUE)
data2 <- subset(data1, !(rownames(data1) %in% other_taxa))
# Do some modification of taxa names
rownames(data2) <- gsub("k_|p_|c_|o_|f_|g_|s_", "", rownames(data2))
rownames(data2) <- gsub(";", ".", rownames(data2))
rownames(data2) <- gsub("]", "_", rownames(data2))
rownames(data2) <- gsub("[", "_", rownames(data2), fixed=TRUE)
rownames(data2) <- gsub("-", "_", rownames(data2))
# Pick out taxa based on lefse list
data_lefse_r <- data2[rownames(data2) %in% rownames(lefse_rep),]
data_lefse_c <- data2[rownames(data2) %in% rownames(lefse_cycle),]
# Merge samples by rep. state
rep <- data.frame(rep=meta$rep_state, row.names=row.names(meta))
data_lefse_r1 <- t(data_lefse_r)
data_lefse_r2 <- merge(rep, data_lefse_r1, by="row.names")
rownames(data_lefse_r2) <- data_lefse_r2[,1]
data_lefse_r3 <- data_lefse_r2[,-1]
data_lefse_r3$rep <- as.factor(data_lefse_r3$rep)
data_lefse_r4 <- droplevels(subset(data_lefse_r3, rownames(data_lefse_r3) != "V32"))
data_lefse_r4_agg <- aggregate(data_lefse_r4[2:ncol(data_lefse_r4)], by=list(data_lefse_r4$rep), FUN=mean, data=data_lefse_r4)
colnames(data_lefse_r4_agg)[1] <- "state"
# Merge samples by cycle phase
cycle <- data.frame(cycle=meta$cycle_phase, row.names = row.names(meta))
cycle1 <- subset(cycle, cycle %in% c("A","S","O","D"))
data_lefse_c1 <- t(data_lefse_c)
data_lefse_c2 <- merge(cycle1, data_lefse_c1, by="row.names")
rownames(data_lefse_c2) <- data_lefse_c2[,1]
data_lefse_c3 <- data_lefse_c2[,-1]
data_lefse_c3$cycle <- as.factor(data_lefse_c3$cycle)
data_lefse_c3_agg <- aggregate(data_lefse_c3[2:ncol(data_lefse_c3)], by=list(data_lefse_c3$cycle), FUN=mean, data=data_lefse_c3)
colnames(data_lefse_c3_agg)[1] <- "state"
# Melt dataframes and sort
data_lefse_r_final <- melt(data_lefse_r4_agg)
colnames(data_lefse_r_final) <- c("state", "taxa", "average")
data_lefse_c_final <- melt(data_lefse_c3_agg)
colnames(data_lefse_c_final) <- c("state", "taxa", "average")
data_lefse_r_final1 <- data_lefse_r_final[order(as.character(data_lefse_r_final

```



```

$taxa)),]
data_lefse_c_final1 <- data_lefse_c_final[order(as.character(data_lefse_c_final
$taxa)),]
# Modify taxa names
data_lefse_r_final1$taxa <- gsub("\\.", "|", data_lefse_r_final1$taxa)
data_lefse_r_final1$taxa <- gsub("Bacteria\\|", "", data_lefse_r_final1$taxa)
data_lefse_r_final1$taxa <- gsub("_", " ", data_lefse_r_final1$taxa)
data_lefse_c_final1$taxa <- gsub("\\.", "|", data_lefse_c_final1$taxa)
data_lefse_c_final1$taxa <- gsub("Bacteria\\|", "", data_lefse_c_final1$taxa)
data_lefse_c_final1$taxa <- gsub("Erysipelotrichaceae_UCG_001", "Erysipelotrich
aceae_UCG-001", data_lefse_c_final1$taxa)
data_lefse_c_final1$taxa <- gsub("_", " ", data_lefse_c_final1$taxa)
# Add a column with phylum (for coloring circles later)
library(splitstackshape)
data_lefse_r_final2 <- data.frame(cSplit(data_lefse_r_final1, "taxa", sep="|",
drop=FALSE))
data_lefse_r_final3 <- subset(data_lefse_r_final2, select = -c(taxa_2,taxa_3,ta
xa_4,taxa_5))
names(data_lefse_r_final3)[4] <- "phylum"
data_lefse_r_final3$phylum <- with(data_lefse_r_final3, factor(phylum, levels =
rev(levels(phylum))))
data_lefse_r_final3$taxa <- as.factor(data_lefse_r_final3$taxa)
data_lefse_r_final3$taxa <- with(data_lefse_r_final3, factor(taxa, levels = rev
(levels(taxa))))
data_lefse_r_final3$average <- data_lefse_r_final3$average*100
data_lefse_c_final2 <- data.frame(cSplit(data_lefse_c_final1, "taxa", sep="|",
drop=FALSE))
data_lefse_c_final3 <- subset(data_lefse_c_final2, select = -c(taxa_2,taxa_3,ta
xa_4,taxa_5,taxa_6))
names(data_lefse_c_final3)[4] <- "phylum"
data_lefse_c_final3$phylum <- with(data_lefse_c_final3, factor(phylum, levels =
rev(levels(phylum))))
data_lefse_c_final3$taxa <- as.factor(data_lefse_c_final3$taxa)
data_lefse_c_final3$taxa <- with(data_lefse_c_final3, factor(taxa, levels = rev
(levels(taxa))))
data_lefse_c_final3$average <- data_lefse_c_final3$average*100
data_lefse_c_final4 <- droplevels(subset(data_lefse_c_final3, phylum != "Archae
a"))
# Add column with significant comparisons
library(ggplot2)
data_lefse_r_final4 <- subset(data_lefse_r_final3, average > 0)
data_lefse_r_final4$state <- factor(data_lefse_r_final4$state, c("C", "P", "PPA
"))
ggplot(data_lefse_r_final4, aes(state,taxa)) +
  geom_point(aes(fill=factor(phylum), size=average), shape=21) +
  theme_bw() + ylab("") + xlab("") + guides(fill = FALSE) +

```

```

scale_size_continuous(range = c(0.5,9), breaks = c(0.01,0.1,1,5,10,20,30,40,5
0), labels = c('\u2264 0.01%', "0.1%", "1%", "5%", "10%", "20%", "30%", "40%", '\u226
5 50%'), name="Average\nRelative\nAbundance") +
  theme(legend.position="right", legend.text.align=0, legend.title.align=0.5, l
egend.background = element_rect(fill="white", size=.5, linetype="solid", color=
"black"), axis.text.x=element_text(angle=45, size=12, vjust=1, hjust=1)) +
  scale_fill_manual(values = c("#A65628", "#FFFF33", "#999999", "#FF7F00", "#984EA3
", "#4DAF4A", "#377EB8")) +
  scale_x_discrete(labels=c("C" = "Ovarian\nCycling", "P" = "Pregnant", "PPA" =
"Postpartum\nAmenorrhea", "D"="Deturgescence"))

```

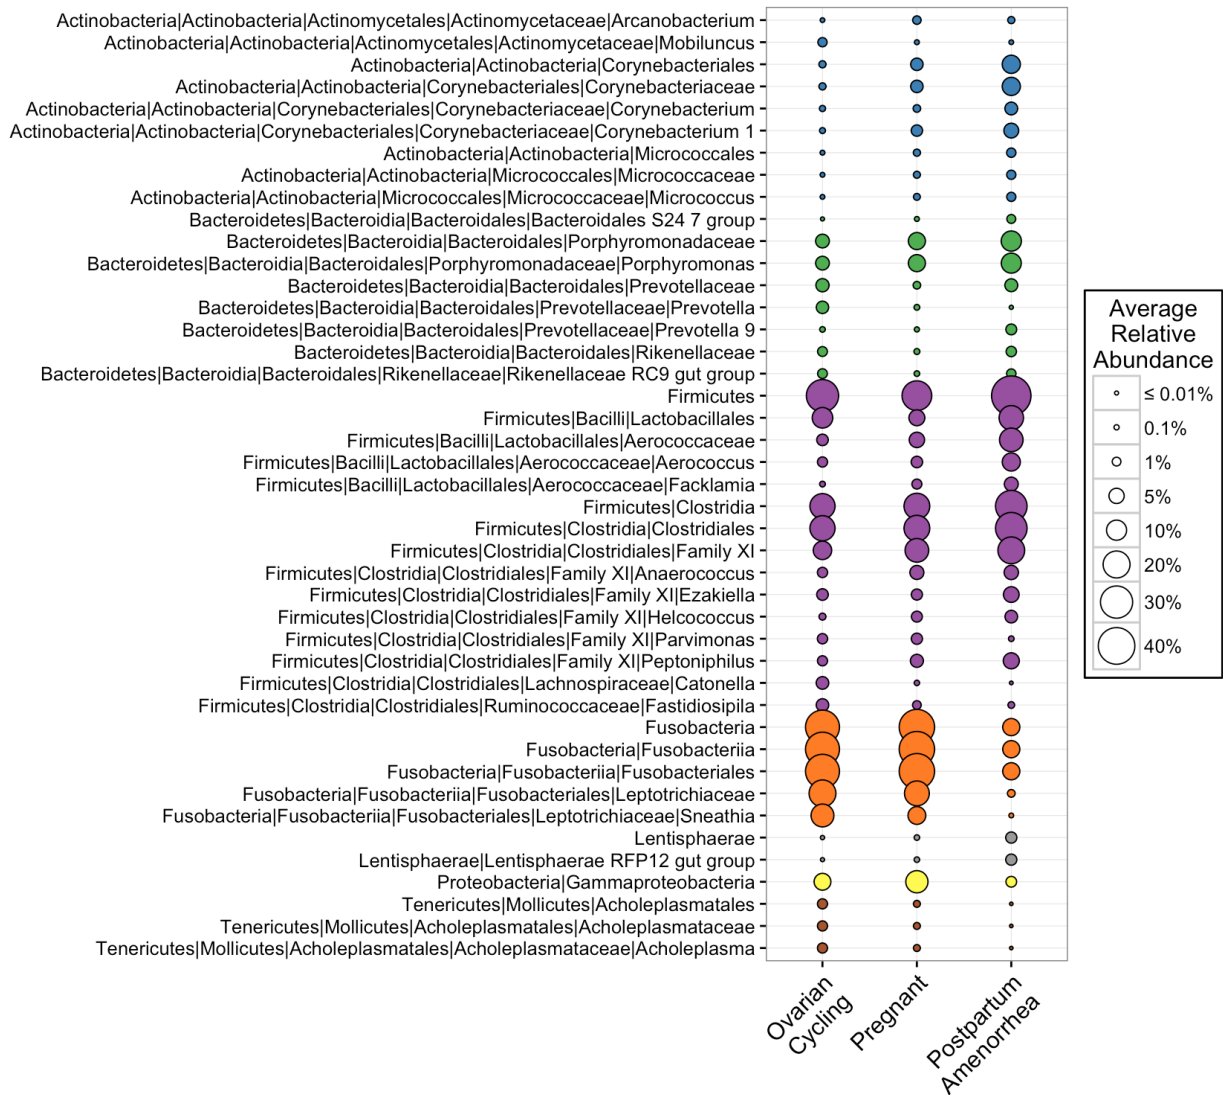

## FIGURE 5B

The relationships between taxonomic levels were added to the figure in Microsoft PowerPoint. The significant LfSe comparisons between ovarian cycle phases were also added in Microsoft PowerPoint.

```

data_lefse_c_final5 <- subset(data_lefse_c_final4, average > 0)
data_lefse_c_final5$state <- factor(data_lefse_c_final5$state, c("A", "S", "O",
"D"))
ggplot(data_lefse_c_final5, aes(state, taxa)) +
  geom_point(aes(fill=factor(phylum), size=average), shape=21) +
  theme_bw() + ylab("") + xlab("") + guides(fill = FALSE) +
  scale_size_continuous(range = c(0.5,9), breaks = c(0.01,0.1,1,5,10,20,30,40,5
0), labels = c('\u2264 0.01%', "0.1%", "1%", "5%", "10%", "20%", "30%", "40%", '\u226
5 50%'), name="Average\nRelative\nAbundance") +
  theme(legend.position="right",
        legend.text.align=0, legend.title.align=0.5, legend.background = elemen
t_rect(fill="white", size=.5, linetype="solid", color="black"), axis.text.x=ele
ment_text(angle=45, size=12, vjust=1, hjust=1)) +
  scale_fill_manual(values = c("#FFFF33", "#FF7F00", "#984EA3", "#4DAF4A", "#377EB8
")) +
  scale_x_discrete(labels=c("A" = "Anestrus", "S" = "Swelling", "O" = "Peri-Ovu
lation", "D"="Deturgescence"))

```

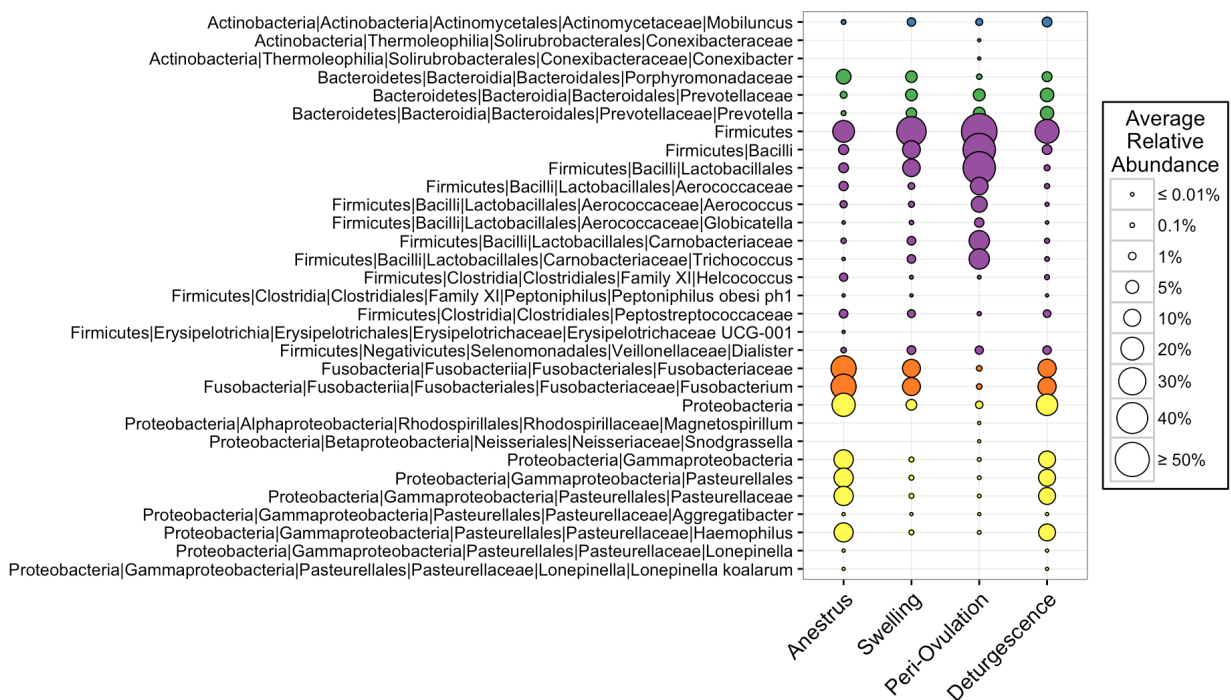

**What is the mean relative abundance of the order Lactobacillales in peri-ovulatory females?**

```

# Mean
subset(data_lefse_c_final4, taxa=="Firmicutes|Bacilli|Lactobacillales" & state=
="O")$average

```

```
## [1] 44.68015
```

```
# Standard Deviation  
sd(data_lefse_c3[c("V51", "V39", "V10", "V50"), "Bacteria.Firmicutes.Bacilli.Lactob  
acillales"])*100
```

```
## [1] 10.13213
```

## FIGURE S7

```

# Remove non-normal cycle days (normal days: -22 through +12)
cycle_norm <- droplevels(subset(meta_C, cycle_day >= -22))
cycle_norm1 <- data.frame(cycle_day=cycle_norm$"cycle_day", sample_id = rowname
s(cycle_norm))
data1 <- t(phylum)
data2 <- as.data.frame(subset(data1, rownames(data1) %in% cycle_norm1$sample_id
))
data2[,"sample_id"] <- rownames(data2)
cycle_norm_taxa <- merge(cycle_norm1, data2, by="sample_id")
firm <- cycle_norm_taxa[,c(1,2,grep("Firmicutes",colnames(cycle_norm_taxa)))]
firm[, "phylum"] <- "Firmicutes"
colnames(firm) <- c("sample_id", "cycle_day_norm", "relative_abundance", "phylu
m")
fuso <- cycle_norm_taxa[,c(1,2,grep("Fusobacteria",colnames(cycle_norm_taxa)))]
fuso[, "phylum"] <- "Fusobacteria"
colnames(fuso) <- c("sample_id", "cycle_day_norm", "relative_abundance", "phylu
m")
firm_fuso <- rbind(firm, fuso)
firm_fuso$phylum <- as.factor(firm_fuso$phylum)
firm_fuso$relative_abundance <- firm_fuso$relative_abundance * 100
# Plot
par(mar=c(5.1, 5.1, 4.1, 2.1), xpd=TRUE) #c(bottom, left, top, right)
plot(firm_fuso$cycle_day_norm, firm_fuso$relative_abundance,
      xlim=c(-22, 12), ylim=c(-20,100), xlab="Day in ovarian cycle", ylab = "Rel
ative phylum abundance (%)",
      cex.axis= 1.5, cex.lab = 1.5, type="n")
firmicutes <- subset(firm_fuso, phylum=="Firmicutes")
firmicutes <- firmicutes[order(firmicutes$cycle_day_norm),]
fusobacteria <- subset(firm_fuso, phylum=="Fusobacteria")
fusobacteria <- fusobacteria[order(fusobacteria$cycle_day_norm),]
xx <- seq(-21,11, length.out=1000)
a <- data.frame(cycle_day_norm = xx)
fuso_fit <- lm(relative_abundance ~ poly(cycle_day_norm,2,row=FALSE), data=fuso
bacteria)
x <- predict(fuso_fit, newdata=a, interval=c("confidence"), level = 0.95, type=
"response")
polygon(c(rev(xx), xx), c(rev(x[,3]), x[,2]),
        col = adjustcolor('grey80',alpha.f=0.5), border = NA)
yy <- seq(-21,11, length.out=500)
b <- data.frame(cycle_day_norm = yy)
firm_fit <- lm(relative_abundance ~ poly(cycle_day_norm,2,row=FALSE), data=firm
icutes)
y <- predict(firm_fit, newdata=b, interval=c("confidence"), level = 0.95, type=
"response")
polygon(c(rev(yy), yy), c(rev(y[,3]), y[,2]),
        col = adjustcolor('grey80',alpha.f=0.5), border = NA)

```

```

lines(xx, x[,"fit"], col='#FF7F00', lwd=1.5)
lines(yy, y[,"fit"], col='#984EA3', lwd=1.5)
points(firm_fuso$cycle_day_norm, firm_fuso$relative_abundance,
       col= c("#984EA3", "#FF7F00")[as.numeric(firm_fuso$phylum)],
       pch=c(19,17)[as.numeric(firm_fuso$phylum)])
legend("topright", inset=c(0.015,0.015), legend=c("Firmicutes","Fusobacteria"),
      pch=c(19,17), col=c("#984EA3", "#FF7F00"), cex=1.25)

```

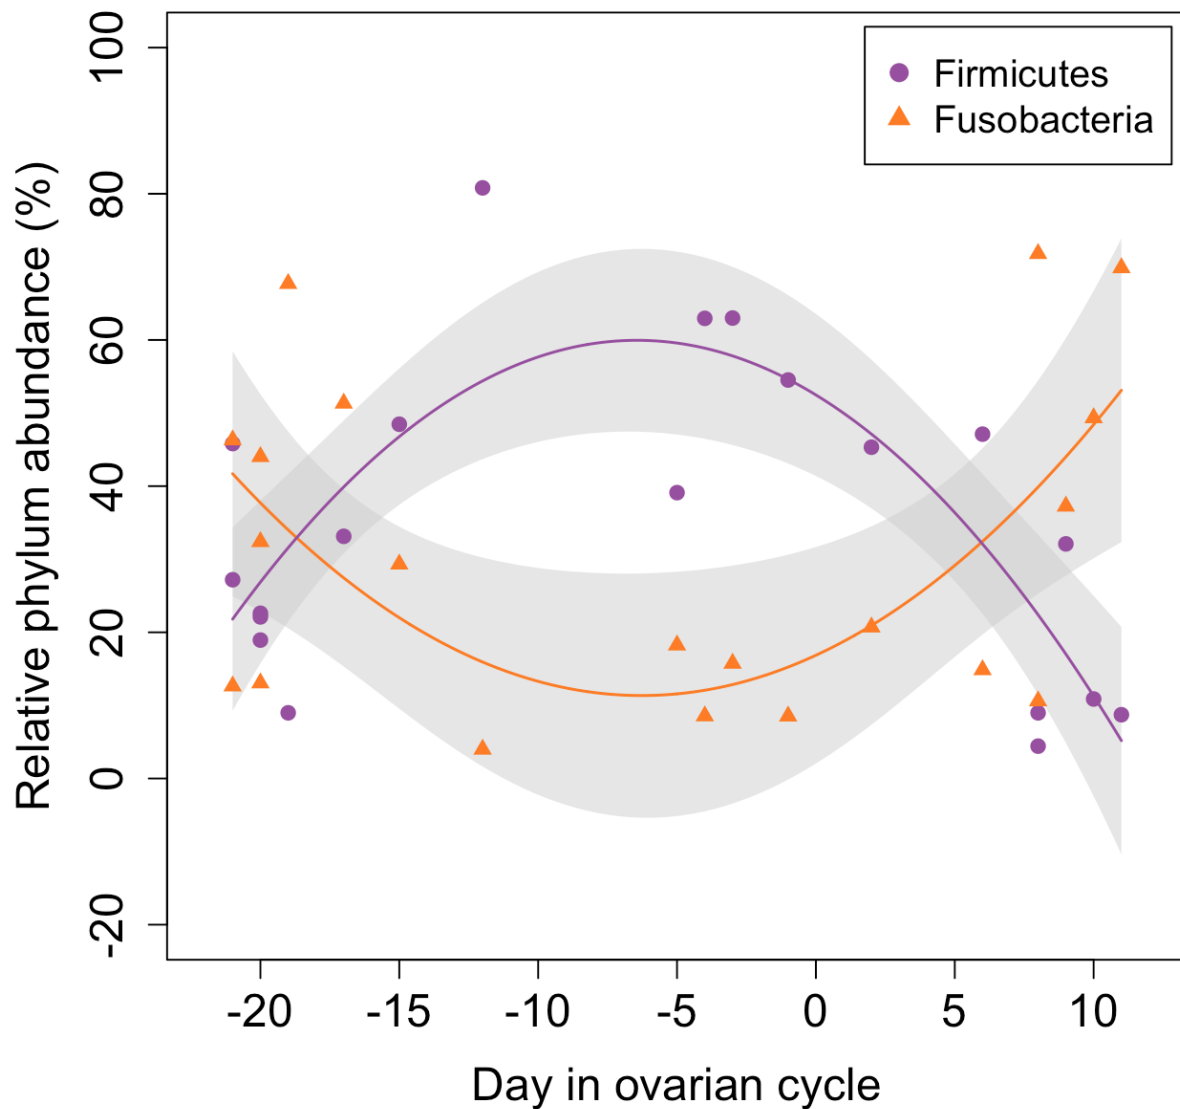

## Vaginal pH

## Is there a significant difference in vaginal pH between reproductive states and ovarian cycle phases?

```
kruskal.test(ph$ph ~ ph$rep_cycle)
```

```
##  
## Kruskal-Wallis rank sum test  
##  
## data: ph$ph by ph$rep_cycle  
## Kruskal-Wallis chi-squared = 11.782, df = 4, p-value = 0.01905
```

Yes.

### FIGURE S8

```
mean_ph <- aggregate(ph$ph, list(ph$rep_cycle), mean)  
colnames(mean_ph) <- c("rep_cycle", "mean")  
sd_ph <- aggregate(ph$ph, list(ph$rep_cycle), sd)  
colnames(sd_ph) <- c("rep_cycle", "sd")  
ph1 <- merge(mean_ph, sd_ph, by="rep_cycle")  
ph1$rep_cycle <- factor(ph1$rep_cycle, levels = c("A", "S", "D", "P", "PPA"))  
ph1 <- ph1[order(ph1$rep_cycle),]  
plot(as.numeric(ph1$rep_cycle), ph1$mean, ylim=c(4,10), xlim=c(0.5,5.5), ylab="Vaginal pH",  
xlab=NA, cex.axis=1.25, cex.lab=1.25, xaxt="n", yaxt="n")  
axis(1, at=c(1,2,3,4,5), labels=c("A", "S", "D", "P", "PPA"), cex.axis=1.25, cex.lab=1.25)  
arrows(as.numeric(ph1[1,1]), ph1[1,2]-ph1[1,3], as.numeric(ph1[1,1]), ph1[1,2]+  
ph1[1,3], length=0.05, angle=90, code=3)  
arrows(as.numeric(ph1[2,1]), ph1[2,2]-ph1[2,3], as.numeric(ph1[2,1]), ph1[2,2]+  
ph1[2,3], length=0.05, angle=90, code=3)  
arrows(as.numeric(ph1[3,1]), ph1[3,2]-ph1[3,3], as.numeric(ph1[3,1]), ph1[3,2]+  
ph1[3,3], length=0.05, angle=90, code=3)  
arrows(as.numeric(ph1[4,1]), ph1[4,2]-ph1[4,3], as.numeric(ph1[4,1]), ph1[4,2]+  
ph1[4,3], length=0.05, angle=90, code=3)  
arrows(as.numeric(ph1[5,1]), ph1[5,2]-ph1[5,3], as.numeric(ph1[5,1]), ph1[5,2]+  
ph1[5,3], length=0.05, angle=90, code=3)  
points(as.numeric(ph1$rep_cycle), ph1$mean, type = "p", bg=c("red", "gold3", "blue", "#FFA500", "#800080"),  
pch=21, cex=1.5)
```

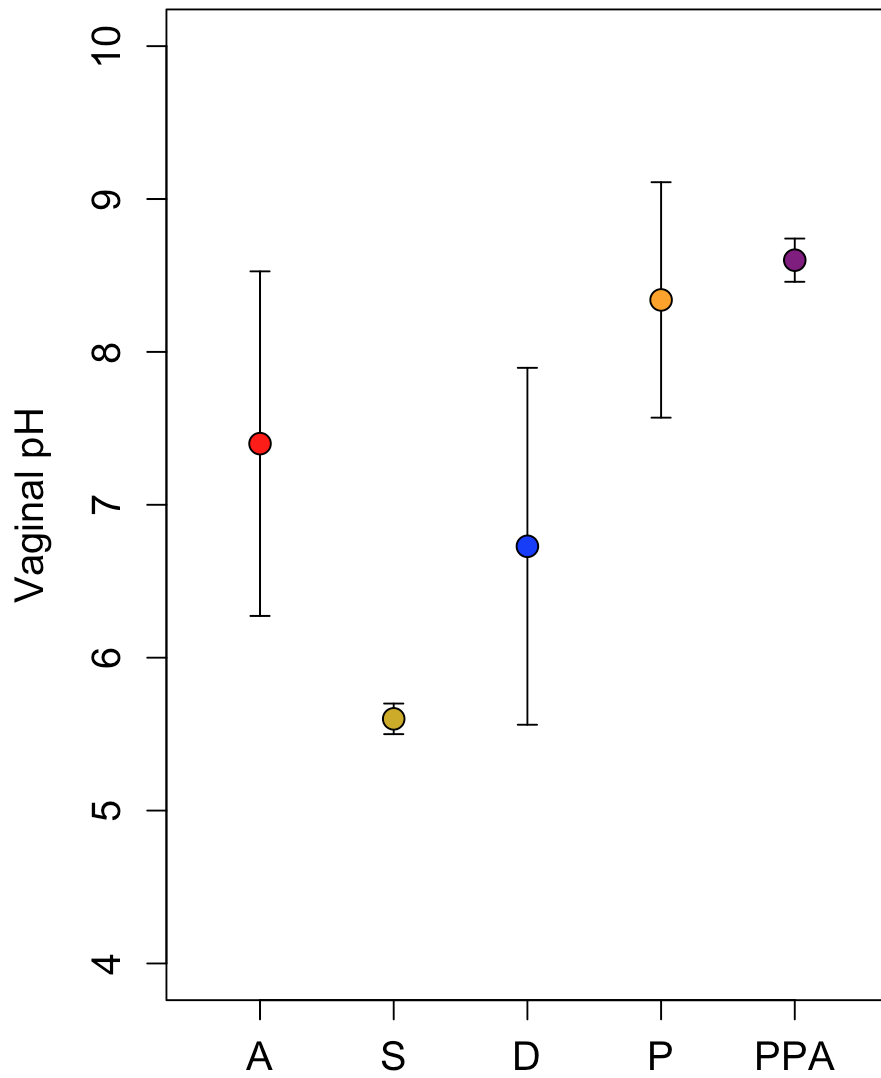

## Vertical and horizontal transmission



```

relate1 <- relate
relate1[upper.tri(relate1, diag = TRUE)] <- NA
r_melt <- melt(relate1)
colnames(r_melt) <- c("sname1", "sname2", "r")
r_melt <- subset(r_melt, !is.na(r))
key <- data.frame(baboon_id=meta$baboon_id, sample_id=rownames(meta))
merge1 <- merge(key, r_melt, by.x="baboon_id", by.y="sname1", all.x=TRUE)
colnames(merge1)[1:2] <- c("baboon_id1", "sample_id1")
merge2 <- merge(key, merge1, by.x="baboon_id", by.y="sname2", all.x=TRUE)
colnames(merge2)[1:2] <- c("baboon_id2", "sample_id2")
parents <- data.frame(sample_id=rownames(meta), mother=meta$mother, father=meta
  $father)
merge3 <- merge(parents, merge2, by.x="sample_id", by.y="sample_id1")
colnames(merge3)[1:3] <- c("sample_id1", "mom1", "dad1")
merge4 <- merge(parents, merge3, by.x="sample_id", by.y="sample_id2")
colnames(merge4)[1:3] <- c("sample_id2", "mom2", "dad2")
merge4$sibtype <- ifelse((merge4$mom1 == merge4$mom2) & (merge4$dad1 == merge4$
  dad2), "full",
  ifelse(merge4$mom1 == merge4$mom2, "mat",
    ifelse(merge4$dad1 == merge4$dad2, "pat", "not")))
merge4[is.na(merge4$sibtype),]$sibtype <- "not"
rep <- data.frame(rep=meta3$rep_cycle, row.names=rownames(meta3))
data1 <- merge(rep, merge4, by.x="row.names", by.y="sample_id1")
colnames(data1)[1:2] <- c("sample_id1", "rep1")
data2 <- merge(rep, data1, by.x="row.names", by.y="sample_id2")
colnames(data2)[1:2] <- c("sample_id2", "rep2")
data3 <- within(data2, {
  reptime <- ifelse(rep1 == rep2, "same", "diff")
})
data4 <- merge(bray_melt, data3, by.x=c("sample_id1", "sample_id2"), by.y=c("sam
  ple_id1", "sample_id2"))
data5 <- merge(unifrac_melt, data4, by.x=c("sample_id1", "sample_id2"), by.y=c("
  sample_id1", "sample_id2"))
# Remove all pairs where the snames are equal (they will also be full sibs)
data6 <- subset(data5, baboon_id1 != baboon_id2)
# Remove all "not" sib pairs with r values >=0.125 (this means they are probabl
  y mother/daughter pairs)
data7 <- subset(data6, !(sibtype == "not" & r >= 0.125))
# How many unique maternal sibling pairs?
nrow(unique(subset(data7, sibtype == "mat"), c("baboon_id1", "baboon_id2")))

```

```
## [1] 10
```

```
# How many unique paternal sibling pairs?
nrow(unique(subset(data7, sibtype == "pat")[,c("baboon_id1", "baboon_id2")]))
```

```
## [1] 15
```

```
# How many unique unrelated pairs?
nrow(unique(subset(data7, sibtype == "not")[,c("baboon_id1", "baboon_id2")]))
```

```
## [1] 1049
```

```
# What is the average relatedness (r) of unrelated pairs?
# Mean
mean(unique(subset(data7, sibtype == "not")[,c("baboon_id1", "baboon_id2", "r")])$r)
```

```
## [1] 0.004524398
```

```
# SD
sd(unique(subset(data7, sibtype == "not")[,c("baboon_id1", "baboon_id2", "r")])$r)
```

```
## [1] 0.01477449
```

### Do maternal siblings have more similar microbiomes than paternal siblings or non-related pairs?

```
# Remove the effect of rep. state
data7$reptype <- as.factor(data7$reptype)
lm_bray <- lm(data7$bray ~ data7$reptype)
resid_bray <- lm_bray$residuals
data8 <- data.frame(data7, resid_bray)
#Unifrac Weighted
lm_unifrac <- lm(data8$unifrac ~ data8$reptype)
resid_unifrac <- lm_unifrac$residuals
data9 <- data.frame(data8, resid_unifrac)
data9$sibtype <- as.factor(data9$sibtype)
data9$sibtype <- factor(data9$sibtype, levels = c("mat", "pat", "not"))
#Bray-Curtis
kruskal.test(data9$resid_bray ~ data9$sibtype)
```

```
##
## Kruskal-Wallis rank sum test
##
## data: data9$resid_bray by data9$sibtype
## Kruskal-Wallis chi-squared = 0.24966, df = 2, p-value = 0.8826
```

```
#Weighted Unifrac
kruskal.test(data9$resid_unifrac ~ data9$sibtype)
```

```
##
## Kruskal-Wallis rank sum test
##
## data: data9$resid_unifrac by data9$sibtype
## Kruskal-Wallis chi-squared = 0.77353, df = 2, p-value = 0.6793
```

No.

**Does overall pairwise genetic relatedness between baboons explain similarity in vaginal microbial communities?**

```
library(reshape2)
r_melt <- melt(related)
colnames(r_melt) <- c("sname1", "sname2", "r")
key <- data.frame(baboon_id=meta$baboon_id, sample_id=row.names(meta))
merge1 <- merge(key, r_melt, by.x="baboon_id", by.y="sname1", all.x=TRUE)
colnames(merge1)[1:2] <- c("baboon_id1", "sample_id1")
merge2 <- merge(key, merge1, by.x="baboon_id", by.y="sname2", all.x=TRUE)
colnames(merge2)[1:2] <- c("baboon_id2", "sample_id2")
related_m <- acast(merge2, sample_id1~sample_id2, value.var="r")
rep_m <- as.matrix(daisy(data.frame(rep=meta$rep_cycle, row.names=row.names(meta
1)), metric="gower"))
bray1 <- bray[match(row.names(related_m), row.names(bray)), match(row.names(related_m
), colnames(bray))]
unifrac1 <- unifrac[match(row.names(related_m), row.names(unifrac)), match(row.names
(related_m), colnames(unifrac))]
rep_m <- rep_m[match(row.names(related_m), row.names(rep_m)), match(row.names(related
_m), colnames(rep_m))]
# Mantel tests
library(vegan)
mantel.partial(bray1, related_m, rep_m, method="pearson", permutations=10000)
```

```
##
## Partial Mantel statistic based on Pearson's product-moment correlation
##
## Call:
## mantel.partial(xdis = bray1, ydis = relate_m, zdis = rep_m, method = "pearson",
##               permutations = 10000)
##
## Mantel statistic r: 0.01533
##      Significance: 0.30457
##
## Upper quantiles of permutations (null model):
##   90%   95%  97.5%   99%
## 0.0350 0.0436 0.0509 0.0597
## Permutation: free
## Number of permutations: 10000
```

```
mantel.partial(unifrac1, relate_m, rep_m, method="pearson", permutations=10000)
```

```
##
## Partial Mantel statistic based on Pearson's product-moment correlation
##
## Call:
## mantel.partial(xdis = unifrac1, ydis = relate_m, zdis = rep_m, method =
##               "pearson", permutations = 10000)
##
## Mantel statistic r: 0.01844
##      Significance: 0.26807
##
## Upper quantiles of permutations (null model):
##   90%   95%  97.5%   99%
## 0.0361 0.0458 0.0537 0.0626
## Permutation: free
## Number of permutations: 10000
```

No.

**Does sharing sexual partners predict vaginal microbial similarity?**

```

# B5 (sample V5) and B30 (sample V17) are not included because they don't have
any consorts (too young)
consort_bray <- as.matrix(vegdist(history, method="bray", binary=FALSE, diag=TR
UE, upper=TRUE))
rep_m1 <- rep_m[rownames(rep_m) %in% rownames(consort_bray), colnames(rep_m) %i
n% rownames(consort_bray)]
rep_m1 <- rep_m1[match(rownames(consort_bray), rownames(rep_m1)),match(rownames
(consort_bray), colnames(rep_m1))]
bray_ss <- bray[rownames(bray) %in% rownames(consort_bray), colnames(bray) %in%
rownames(consort_bray)]
bray_ss <- bray1[match(rownames(consort_bray), rownames(bray1)),match(rownames(
consort_bray), colnames(bray1))]
unifrac_ss <- unifrac[rownames(unifrac) %in% rownames(consort_bray), colnames(u
nifrac) %in% rownames(consort_bray)]
unifrac_ss <- unifrac1[match(rownames(consort_bray), rownames(unifrac1)),match(
rownames(consort_bray), colnames(unifrac1))]
mantel.partial(bray_ss, consort_bray, rep_m1, method="pearson", permutations=10
000)

```

```

##
## Partial Mantel statistic based on Pearson's product-moment correlation
##
## Call:
## mantel.partial(xdis = bray_ss, ydis = consort_bray, zdis = rep_m1,      meth
od = "pearson", permutations = 10000)
##
## Mantel statistic r: 0.0515
##      Significance: 0.044696
##
## Upper quantiles of permutations (null model):
##   90%   95%  97.5%   99%
## 0.0377 0.0496 0.0599 0.0731
## Permutation: free
## Number of permutations: 10000

```

```

mantel.partial(unifrac_ss, consort_bray, rep_m1, method="pearson", permutations
=10000)

```

```

##
## Partial Mantel statistic based on Pearson's product-moment correlation
##
## Call:
## mantel.partial(xdis = unfrac_ss, ydis = consort_bray, zdis = rep_m1,      m
ethod = "pearson", permutations = 10000)
##
## Mantel statistic r: 0.04339
##      Significance: 0.065493
##
## Upper quantiles of permutations (null model):
##      90%      95%  97.5%      99%
## 0.0364 0.0477 0.0594 0.0732
## Permutation: free
## Number of permutations: 10000

```

Yes!

### Does individual identity predict vaginal microbial similarity?

```

bid <- data.frame(baboon_id=meta[, "baboon_id"], row.names=row.names(meta))
bid_m <- as.matrix(daisy(bid, metric="gower"))
bray1 <- bray[match(row.names(bid_m), row.names(bray)), match(row.names(bid_m), col
names(bray))]
unfrac1 <- unfrac[match(row.names(bid_m), row.names(unfrac)), match(row.names(bi
d_m), colnames(unfrac))]
rep_m <- rep_m[match(row.names(bid_m), row.names(rep_m)), match(row.names(bid_m), c
olnames(rep_m))]
mantel.partial(bray1, bid_m, rep_m, method="pearson", permutations=10000)

```

```

##
## Partial Mantel statistic based on Pearson's product-moment correlation
##
## Call:
## mantel.partial(xdis = bray1, ydis = bid_m, zdis = rep_m, method = "pearson",
permutations = 10000)
##
## Mantel statistic r: 0.03127
##      Significance: 0.13289
##
## Upper quantiles of permutations (null model):
##      90%      95%  97.5%      99%
## 0.0364 0.0477 0.0578 0.0697
## Permutation: free
## Number of permutations: 10000

```

```
mantel.partial(unifrac1, bid_m, rep_m, method="pearson", permutations=10000)
```

```
##  
## Partial Mantel statistic based on Pearson's product-moment correlation  
##  
## Call:  
## mantel.partial(xdis = unifrac1, ydis = bid_m, zdis = rep_m, method = "pearson",  
##      permutations = 10000)  
##  
## Mantel statistic r: 0.0235  
##      Significance: 0.19098  
##  
## Upper quantiles of permutations (null model):  
##      90%      95%      97.5%      99%  
## 0.0343 0.0439 0.0526 0.0626  
## Permutation: free  
## Number of permutations: 10000
```

No.

### Does similarity in age predict vaginal microbial similarity?

```
age <- data.frame(age=meta[, "age"], row.names=row.names(meta))  
age.dist <- as.matrix(dist(age, method = "manhattan", upper=TRUE, diag=TRUE))  
bray1 <- bray[match(row.names(age.dist), row.names(bray)), match(row.names(age.dist),  
##      col.names(bray))]  
unifrac1 <- unifrac[match(row.names(age.dist), row.names(unifrac)), match(row.names  
##      (age.dist), col.names(unifrac))]  
rep_m <- rep_m[match(row.names(age.dist), row.names(rep_m)), match(row.names(age.di  
##      st), col.names(rep_m))]  
mantel.partial(bray1, age.dist, rep_m, method="pearson", permutations=10000)
```

```
##
## Partial Mantel statistic based on Pearson's product-moment correlation
##
## Call:
## mantel.partial(xdis = bray1, ydis = age.dist, zdis = rep_m, method = "pearson",
##               permutations = 10000)
##
## Mantel statistic r: -0.04683
##      Significance: 0.74893
##
## Upper quantiles of permutations (null model):
##      90%      95%      97.5%      99%
## 0.0848 0.1118 0.1345 0.1639
## Permutation: free
## Number of permutations: 10000
```

```
mantel.partial(unifrac1, age.dist, rep_m, method="pearson", permutations=10000)
```

```
##
## Partial Mantel statistic based on Pearson's product-moment correlation
##
## Call:
## mantel.partial(xdis = unifrac1, ydis = age.dist, zdis = rep_m, method =
##               "pearson", permutations = 10000)
##
## Mantel statistic r: -0.0451
##      Significance: 0.72353
##
## Upper quantiles of permutations (null model):
##      90%      95%      97.5%      99%
## 0.0922 0.1253 0.1514 0.1813
## Permutation: free
## Number of permutations: 10000
```

No.

**Does social group co-residency predict vaginal microbial similarity?**



```

grp <- data.frame(grp=meta["social_grp"], row.names=row.names(meta))
grp.dist <- as.matrix(daisy(grp, metric="gower"))

bray1 <- bray[match(rownames(grp.dist), rownames(bray)),match(rownames(grp.dist)
), colnames(bray)]]
unifrac1 <- unifrac[match(rownames(grp.dist), rownames(unifrac)),match(rownames
(grp.dist), colnames(unifrac))]
rep_m <- rep_m[match(rownames(grp.dist), rownames(rep_m)),match(rownames(grp.di
st), colnames(rep_m))]
mantel.partial(bray1, grp.dist, rep_m, method="pearson", permutations=10000)

```

```

##
## Partial Mantel statistic based on Pearson's product-moment correlation
##
## Call:
## mantel.partial(xdis = bray1, ydis = grp.dist, zdis = rep_m, method = "pearso
n",      permutations = 10000)
##
## Mantel statistic r: 0.01359
##      Significance: 0.26707
##
## Upper quantiles of permutations (null model):
##      90%      95%  97.5%      99%
## 0.0327 0.0438 0.0540 0.0654
## Permutation: free
## Number of permutations: 10000

```

```

mantel.partial(unifrac1, grp.dist, rep_m, method="pearson", permutations=10000)

```

```

##
## Partial Mantel statistic based on Pearson's product-moment correlation
##
## Call:
## mantel.partial(xdis = unifrac1, ydis = grp.dist, zdis = rep_m,      method =
"pearson", permutations = 10000)
##
## Mantel statistic r: 0.008199
##      Significance: 0.34287
##
## Upper quantiles of permutations (null model):
##      90%      95%  97.5%      99%
## 0.0330 0.0444 0.0561 0.0707
## Permutation: free
## Number of permutations: 10000

```

No.
